# Supplementary material for: Global, regional, and national burden of cervical cancer for 195 countries and territories, 2007–2017: findings from the Global Burden of Disease Study 2017
Source: PubMed Central journal article supplement (PMC8684284; doi:10.1186/s12905-021-01571-3), 2021-12-18
Supplement: 12905_2021_1571_MOESM1_ESM.pdf [file 12905_2021_1571_MOESM1_ESM.pdf]

**Table S1.** Incidence, DALYs and deaths for cervical cancer in 2017 and percentage changes between 2007 and 2017, by SDI quintiles and by region.

|                              | Incidence (95%UI)                |                                       | DALYs (95%UI)                       |                                       | Deaths (95%UI)                   |                                       |
|------------------------------|----------------------------------|---------------------------------------|-------------------------------------|---------------------------------------|----------------------------------|---------------------------------------|
|                              | 2017 counts                      | Percentage changes in cases,2007-2017 | 2017 counts                         | Percentage changes in cases,2007-2017 | 2017 counts                      | Percentage changes in cases,2007-2017 |
| <b>Global</b>                | <b>601186 (554455 to 625402)</b> | <b>18.9 (12.8 to 23.0)</b>            | <b>8061667 (7527014 to 8401647)</b> | <b>15.2 (9.5 to 19.2)</b>             | <b>218631 (204174 to 230958)</b> | <b>18.8 (12.9 to 22.8)</b>            |
| <b>Low SDI</b>               | <b>106167 (95862 to 116712)</b>  | <b>26.4 (17.8 to 35.8)</b>            | <b>1710473 (1541497 to 1882373)</b> | <b>22.2 (14.4 to 31.4)</b>            | <b>39529(35527 to 43401)</b>     | <b>24.3(15.9 to 33.3)</b>             |
| <b>Low-middle SDI</b>        | <b>129180 (116270 to 144856)</b> | <b>23.6 (16.4 to 32.6)</b>            | <b>1894281 (1713065 to 2137452)</b> | <b>19.1 (12.4 to 28.1)</b>            | <b>46355(41747 to 53907)</b>     | <b>22(15.3 to 30.9)</b>               |
| <b>Middle SDI</b>            | <b>186320 (152840 to 195853)</b> | <b>23.4 (11.8 to 30.3)</b>            | <b>2456312 (2009841 to 2581203)</b> | <b>18.4 (7.6 to 24.3)</b>             | <b>64413(58640 to 66525)</b>     | <b>24.4(13.3 to 30.3)</b>             |
| <b>High-middle SDI</b>       | <b>102547 (89511 to 108141)</b>  | <b>12.2 (-0.4 to 18.2)</b>            | <b>1227689 (1073166 to 1290650)</b> | <b>6.5 (-6 to 11.8)</b>               | <b>37849(36968 to 39019)</b>     | <b>11.3(-1.4 to 16.7)</b>             |
| <b>High SDI</b>              | <b>74634 (72233 to 77053)</b>    | <b>2.1 (-1.2 to 5.6)</b>              | <b>742813 (719395 to 767913)</b>    | <b>-1.7 (-4.6 to 1.2)</b>             | <b>29748(29499 to 30081)</b>     | <b>3.2(0.3 to 6.3)</b>                |
| Central Asia                 | 7101 (6527 to 7760)              | 4.0 (-4.9 to 13.7)                    | 97090 (90080 to 104919)             | -0.6 (-8.2 to 7.5)                    | 2840(2745 to 2944)               | 0.3(-6.8 to 8.1)                      |
| Central Europe               | 13320 (12602 to 14105)           | -15.8 (-20.1 to -11.2)                | 182097 (173456 to 191669)           | -18.9 (-22.8 to -14.8)                | 7912(7761 to 8071)               | -12.8(-16.9 to -8.4)                  |
| Eastern Europe               | 21930 (20770 to 23132)           | -18.4 (-23.3 to -13.4)                | 242922 (233739 to 252335)           | -26.2 (-28.8 to -23.3)                | 10907(10748 to 11084)            | -23.5(-26.1to -20.7)                  |
| Australasia                  | 1152 (984 to 1344)               | 8.9 (-7.2 to 29.1)                    | 13238 (11573 to 15127)              | 7.1 (-7.4 to 23.1)                    | 506(491 to 522)                  | 9.3(-4.2 to 24.6)                     |
| High-income Asia Pacific     | 15490 (14526 to 16613)           | -0.1 (-6.7 to 7.0)                    | 121991 (116437 to 128700)           | -6.7 (-11 to -1.7)                    | 5174(5095 to 5262)               | 2.5(-1.8 to 7.5)                      |
| High-income North America    | 23037 (21875 to 24240)           | 13.4 (7.4 to 20.1)                    | 228627 (217630 to 239893)           | 13.4 (8.1 to 19.0)                    | 7178(7072 to 7294)               | 17.5(12.5 to 22.6)                    |
| Southern Latin America       | 10926 (9423 to 12650)            | 14.3 (-1.7 to 33.4)                   | 121469 (107025 to 137962)           | 7.1 (-6.4 to 22.2)                    | 4018(3878 to 4170)               | 7.2(-4.9 to 21)                       |
| Western Europe               | 26183 (24707 to 27712)           | -2.4 (-7.7 to 3.5)                    | 260403 (246354 to 274976)           | -4.3 (-9.1 to 0.8)                    | 11733(11571 to 11922)            | 0.3(-4.4 to 5.2)                      |
| Andean Latin America         | 7347 (6216 to 8479)              | 12.4 (-3.7 to 31.0)                   | 102588 (87071 to 117597)            | 7.1 (-7.0 to 23.3)                    | 3074(2792 to 3362)               | 12.8(-1.2 to 28.8)                    |
| Caribbean                    | 6705 (5560 to 7824)              | 13.3 (1.3 to 26.0)                    | 96573 (79167 to 113794)             | 12.2 (0.9 to 25.2)                    | 2633(2264 to 2989)               | 15.7(5.1 to 28)                       |
| Central Latin America        | 26756 (25148 to 28660)           | 16.8 (9.5 to 25.2)                    | 353069 (333387 to 373695)           | 12.4 (6.2 to 19.6)                    | 9870(9700 to 10057)              | 15.1(9.0 to 22.2)                     |
| Tropical Latin America       | 24126 (23143 to 25222)           | 17.6 (12.3 to 23.7)                   | 316023 (305123 to 329010)           | 11.7 (7.3 to 16.6)                    | 8977(8773 to 9170)               | 13.6(9.4 to 18.4)                     |
| North Africa and Middle East | 14577 (12548 to 16180)           | 20.3 (11.3 to 31.2)                   | 187684 (159194 to 208843)           | 14.7 (6.8 to 24.4)                    | 4935(4330 to 5410)               | 17.7(9.8 to 26.9)                     |
| East Asia                    | 113036 (73551 to 122613)         | 42.0 (7.9 to 54.5)                    | 1423547 (923640 to 1544767)         | 35.1 (1.3 to 46.1)                    | 33281(29153 to 34581)            | 44.5(9.2 to 56.0)                     |
| Oceania                      | 2325 (1583 to 3172)              | 28.2 (2.9 to 60.4)                    | 32058 (22840 to 42233)              | 25.9 (5.0 to 53.3)                    | 639(493 to 818)                  | 27.6(8.6 to 51.1)                     |

|                             |                        |                       |                           |                       |                       |                      |
|-----------------------------|------------------------|-----------------------|---------------------------|-----------------------|-----------------------|----------------------|
| Southeast Asia              | 62047 (52363 to 69261) | 9.0 (0.6 to 20.4)     | 806446 (674759 to 906591) | 2.9 (-4.4 to 12.9)    | 23822(19745 to 26867) | 7.8(0.5 to 17.1)     |
| Central sub-Saharan Africa  | 16071 (11496 to 20128) | 21.3 (3.8 to 43.2)    | 265271 (193429 to 332876) | 17.0 (-0.5 to 38.5)   | 6419(4620 to 7788)    | 18.3(0.7 to 39.4)    |
| Eastern sub-Saharan Africa  | 39062 (33250 to 46432) | 23.6 (13.3 to 36.8)   | 646308 (549919 to 769675) | 18.0 (8.9 to 29.7)    | 15719(13108 to 18222) | 18.7(10.1 to 29.6)   |
| Southern sub-Saharan Africa | 12498 (11079 to 13588) | -17.8 (-29.9 to -7.0) | 182929 (162744 to 199885) | -17.6 (-27.5 to -7.8) | 6582(6057 to 7431)    | -10.7(-19.8 to -1.0) |
| Western sub-Saharan Africa  | 39955 (31011 to 49933) | 30.2 (12.6 to 51.5)   | 611846 (480371 to 753733) | 28.6 (13.7 to 47.7)   | 13637(10774 to 16838) | 29.8(16.2 to 48.4)   |

UI= 95% uncertainty intervals. DALYs=disability-adjusted life-years. SDI=Socio-demographic Index.
