# Supplementary material for: Global, regional, and national burden of cervical cancer for 195 countries and territories, 2007–2017: findings from the Global Burden of Disease Study 2017
Source: PubMed Central journal article supplement (PMC8684284; doi:10.1186/s12905-021-01571-3), 2021-12-18
Supplement: 12905_2021_1571_MOESM3_ESM.pdf [file 12905_2021_1571_MOESM3_ESM.pdf]

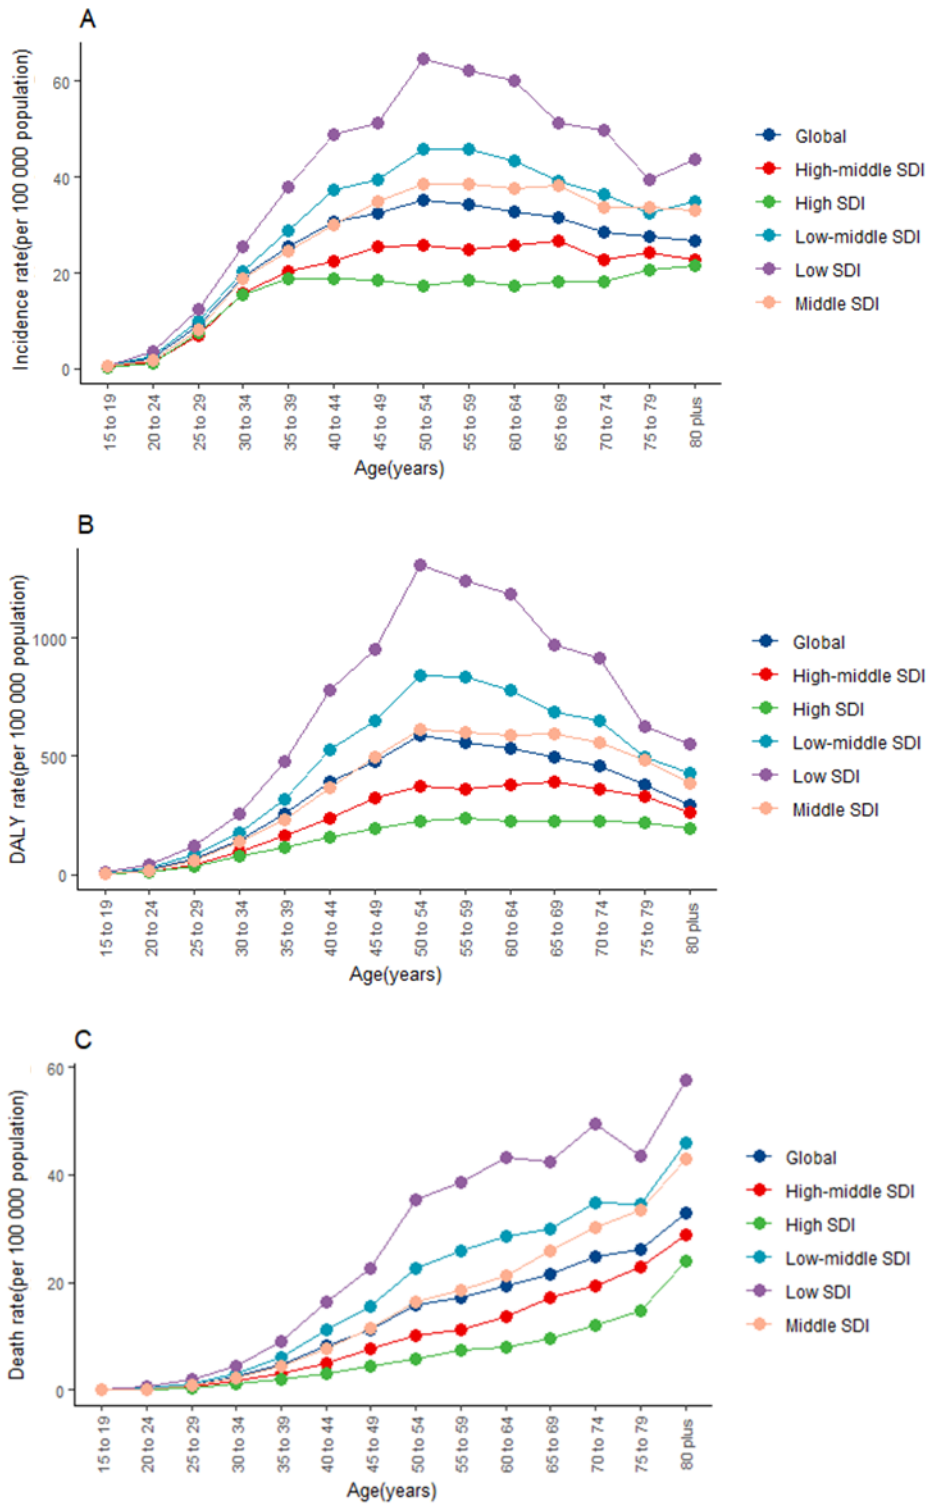

**Figure S1: Age-specific incidence(A), DALYs(B), and death(C) rates of cervical cancer by SDI quintiles.**

DALYs=disability-adjusted life-years. SDI= Socio-demographic Index.
