# Supplementary material for: Global, regional, and national burden of cervical cancer for 195 countries and territories, 2007–2017: findings from the Global Burden of Disease Study 2017
Source: Springer Nature journal article supplement (doi:10.1186/s12905-021-01571-3), 2021-12-18
Supplement: MOESM2 [file 19967638]

**Table S2.** Incidence, DALYs and deaths for cervical cancer in 2017 and percentage changes in age-standardized rates between 2007 and 2017, by location.

|                     | Incidence (95%UI) |                                       |                                                        | DALYs(95%UI)      |                                       |                                                        | Deaths (95%UI)   |                                       |                                                        |
|---------------------|-------------------|---------------------------------------|--------------------------------------------------------|-------------------|---------------------------------------|--------------------------------------------------------|------------------|---------------------------------------|--------------------------------------------------------|
|                     | 2017 counts       | Percentage changes in cases,2007-2017 | Percentage changes in age-standardized rates,2007-2017 | 2017 counts       | Percentage changes in cases,2007-2017 | Percentage changes in age-standardized rates,2007-2017 | 2017 counts      | Percentage changes in cases,2007-2017 | Percentage changes in age-standardized rates,2007-2017 |
| <b>Central Asia</b> | <b>7101</b>       | <b>4.0</b>                            | <b>-16.2</b>                                           | <b>97090</b>      | <b>-0.6</b>                           | <b>-20.8</b>                                           | <b>2840</b>      | <b>0.3</b>                            | <b>-20.6</b>                                           |
|                     | (6527 to 7760)    | (-4.9 to 13.7)                        | (-23.2 to -8.6)                                        | (90080 to 104919) | (-8.2 to 7.5)                         | (-26.8 to -14.4)                                       | (2745 to 2944)   | (-6.8 to 8.1)                         | (-26 to -14.6)                                         |
| Armenia             | 320               | -12.5                                 | -16.0                                                  | 4399              | -15.8                                 | -19.4                                                  | 170              | -9.6                                  | -15.8                                                  |
|                     | (283 to 360)      | (-23.3 to 0.8)                        | (-26.8 to -2.5)                                        | (4004 to 4787)    | (-24.3 to -6.1)                       | (-27.8 to -9.7)                                        | (160 to 181)     | (-18.1 to -0.5)                       | (-23.6 to -6.8)                                        |
| Azerbaijan          | 676               | 7.9                                   | -16.3                                                  | 9185              | -0.3                                  | -24.1                                                  | 262              | 2.2                                   | -24.5                                                  |
|                     | (538 to 838)      | (-13.5 to 32.2)                       | (-32.4 to 2.9)                                         | (7523 to 11142)   | (-17.7 to 19.4)                       | (-36.7 to -9.9)                                        | (233 to 294)     | (-14.8 to 21.7)                       | (-36.3 to -10.8)                                       |
| Georgia             | 492               | 20.0                                  | 27.9                                                   | 7023              | 18.9                                  | 25.5                                                   | 244.4            | 23.2                                  | 27.1                                                   |
|                     | (436 to 558)      | (4.0 to 37.6)                         | (10.6 to 48.3)                                         | (6366 to 7701)    | (6.23 to 33.20)                       | (11.8 to 41.1)                                         | (223.6 to 267.1) | (10.4 to 36.9)                        | (14.5 to 41.0)                                         |
| Kazakhstan          | 1749              | -17.0                                 | -29.4                                                  | 22302             | -24.1                                 | -35.6                                                  | 884              | -25.2                                 | -36.8                                                  |
|                     | (1499 to 2034)    | (-28.8 to -3.4)                       | (-39.6 to -17.8)                                       | (19977 to 2427)   | (-32.9 to -14.5)                      | (-43.1 to -27.3)                                       | (845 to 925)     | (-33.1 to -16.7)                      | (-43.2 to -29.3)                                       |
| Kyrgyzstan          | 510               | -2.5                                  | -20.1                                                  | 7238              | -3.3                                  | -21.6                                                  | 212              | -0.1                                  | -18.3                                                  |
|                     | (445 to 589)      | (-16.1 to 14.4)                       | (-30.8 to -6.7)                                        | (6553 to 7966)    | (-13.3 to 8.3)                        | (-29.4 to -10e2.3)                                     | (200 to 223)     | (-9.9 to 10.9)                        | (-26.0 to -9.5)                                        |
| Mongolia            | 306               | 16.4                                  | -20.1                                                  | 4658              | 14.9                                  | -22.8                                                  | 117              | 18.5                                  | -21.5                                                  |
|                     | (242 to 384)      | (-8.1 to 49.6)                        | (-35.7 to 1.3)                                         | (3869 to 5695)    | (-7 to 45.3)                          | (-36.7 to -3.1)                                        | (102 to 134)     | (-2.0 to 47.6)                        | (-34.6 to -3.8)                                        |
| Tajikistan          | 231               | 64.9                                  | 14.7                                                   | 3432              | 60.7                                  | 10.5                                                   | 61               | 60.3                                  | 11.2                                                   |
|                     | (187 to 294)      | (27.6 to 106.9)                       | (-9.4 to 41.8)                                         | (2829 to 4321)    | (27.0 to 99.7)                        | (-11.2 to 34.6)                                        | (53 to 84)       | (29.4 to 95.9)                        | (-9.3 to 34.5)                                         |
| Turkmenistan        | 465               | 26.3                                  | 2.8                                                    | 6522              | 19.9                                  | -4.3                                                   | 147              | 24.1                                  | -4.1                                                   |

|                        |                         |                         |                         |                           |                         |                       |                       |                        |                         |
|------------------------|-------------------------|-------------------------|-------------------------|---------------------------|-------------------------|-----------------------|-----------------------|------------------------|-------------------------|
|                        | (388 to 546)            | (3.5 to 51.3)           | (-15.1 to 22.1)         | (5618 to 7466)            | (1.2 to 40.3)           | (-18.3 to 12.3)       | (138 to 157)          | (6.7 to 44.1)          | (-17.4 to 11)           |
| Uzbekistan             | 2351                    | 16.3                    | -12.7                   | 32332                     | 12.0                    | -17.2                 | 789                   | 12.8                   | -18.1                   |
|                        | (1886 to 2936)          | (-8.1 to 45.9)          | (-30.1 to 8.8)          | (26812 to 39129)          | (-9.2 to 38.3)          | (-32.5 to 1.6)        | (721 to 862)          | (-8.1 to 37.8)         | (-32.7 to -0.4)         |
| <b>Central Europe</b>  | <b>13320</b>            | <b>-15.8</b>            | <b>-19.6</b>            | <b>182097</b>             | <b>-18.9</b>            | <b>-23.3</b>          | <b>7912</b>           | <b>-12.8</b>           | <b>-21.1</b>            |
|                        | <b>(12602 to 14105)</b> | <b>(-20.1 to -11.2)</b> | <b>(-24.1 to -14.8)</b> | <b>(173456 to 191669)</b> | <b>(-22.8 to -14.8)</b> | <b>(-27 to -19.3)</b> | <b>(7761 to 8071)</b> | <b>(-16.9 to -8.4)</b> | <b>(-24.8 to -17.2)</b> |
| Albania                | 127                     | -6.9                    | -10.1                   | 1667                      | -7.6                    | -14.7                 | 56                    | 0.8                    | -14.8                   |
|                        | (89 to 172)             | (-31.5 to 26.4)         | (-34.7 to 21.9)         | (1184 to 2224)            | (-32.3 to 23.5)         | (-37.9 to 14.9)       | (48 to 64)            | (-25.2 to 33.6)        | (-37.1 to 12.9)         |
| Bosnia and Herzegovina | 316                     | -14.2                   | -8.7                    | 4464                      | -15.3                   | -11.7                 | 173                   | -8.5                   | -9.8                    |
|                        | (256 to 368)            | (-28.4 to 3.4)          | (-23.8 to 10.4)         | (3759 to 5108)            | (-27.4 to -0.3)         | (-24 to 4.6)          | (148 to 194)          | (-20.7 to 6.1)         | (-21.4 to 5.0)          |
| Bulgaria               | 1041                    | -11.1                   | -5.4                    | 13521                     | -15.8                   | -11.6                 | 544                   | -14.4                  | -12.8                   |
|                        | (907 to 1177)           | (-22.2 to 1.7)          | (-18.4 to 9.3)          | (12111 to 15003)          | (-24.9 to -6)           | (-21.8 to -0.8)       | (521 to 567)          | (-22.9 to -4.8)        | (-22.0 to -3.0)         |
| Croatia                | 447                     | -14.1                   | -17.0                   | 4040                      | -14.5                   | -18.7                 | 193                   | -6.8                   | -16.0                   |
|                        | (388 to 513)            | (-26.4 to -1)           | (-29.4 to -3.5)         | (3605 to 4525)            | (-24.6 to -3.9)         | (-28.7 to -8.2)       | (183 to 202)          | (-17.6 to 4.3)         | (-25.5 to -6.1)         |
| Czech Republic         | 1018                    | -8.9                    | -13.1                   | 12114                     | -12.4                   | -18.9                 | 543                   | -8.0                   | -19.3                   |
|                        | (893 to 1156)           | (-20.2 to 4.2)          | (-25.1 to 1)            | (10879 to 13360)          | (-21.6 to -2.5)         | (-27.9 to -9.4)       | (524 to 564)          | (-16.7 to 1.9)         | (-27.4 to -10.8)        |
| Hungary                | 906                     | -17.2                   | -20.5                   | 11816                     | -16.6                   | -20.6                 | 517                   | -11.8                  | -18.4                   |
|                        | (797 to 1029)           | (-27.9 to -6.2)         | (-31.9 to -8.3)         | (10600 to 13059)          | (-25.3 to -7.2)         | (-29.2 to -11.4)      | (499 to 537)          | (-20.3 to -2.4)        | (-26.4 to -9.6)         |
| Macedonia              | 183                     | -2.8                    | -10.4                   | 2398                      | -6.6                    | -15.2                 | 81                    | -5.6                   | -17.8                   |
|                        | (151 to 218)            | (-17.7 to 17.1)         | (-24.8 to 8.1)          | (2021 to 2850)            | (-20.3 to 12.3)         | (-27.6 to 2.1)        | (73 to 91)            | (-19.7 to 13.3)        | (-29.8 to -1.7)         |
| Montenegro             | 55                      | -12.5                   | -17.1                   | 699                       | -14.4                   | -20.1                 | 27                    | -7.5                   | -16.8                   |
|                        | (45 to 67)              | (-28.1 to 6.6)          | (-32.8 to 2.5)          | (699 to 844)              | (-27.6 to 1.7)          | (-33.1 to -4.1)       | (24 to 31)            | (-21.2 to 9.2)         | (-29.4 to -2.1)         |
| Poland                 | 3237                    | -18.8                   | -26.4                   | 54103                     | -24.2                   | -31.0                 | 2629                  | -17.1                  | -28.3                   |
|                        | (2908 to 3616)          | (-27.9 to -9.5)         | (-34.7 to -17.4)        | (48535 to 60310)          | (-32.5 to -15.3)        | (-38.3 to -22.7)      | (2543 to 2716)        | (-25.4 to -7.9)        | (-35.6 to -20.3)        |
| Romania                | 3810                    | -17.5                   | -17.5                   | 50988                     | -18.2                   | -19.8                 | 2042                  | -11.5                  | -16.6                   |
|                        | (3344 to 4341)          | (-27.4 to -6.2)         | (-27.9 to -5.6)         | (46330 to 55924)          | (-26.2 to -9.7)         | (-27.9 to -10.8)      | (1964 to 2118)        | (-19.8 to -2.2)        | (-24.7 to -7.8)         |
| Serbia                 | 1352                    | -19.2                   | -21.8                   | 17558                     | -19.7                   | -22.2                 | 764                   | -11.8                  | -17.2                   |

|                       |                         |                         |                         |                           |                         |                       |                         |                         |                         |
|-----------------------|-------------------------|-------------------------|-------------------------|---------------------------|-------------------------|-----------------------|-------------------------|-------------------------|-------------------------|
|                       | (1160 to 1564)          | (-30.9 to -6.5)         | (-33.7 to -7.8)         | (15231 to 19924)          | (-28.9 to -9.2)         | (-31.2 to -11.7)      | (696 to 818)            | (-21.4 to -1.0)         | (-26.1 to -7.0)         |
| Slovakia              | 682                     | -2.9                    | -9.1                    | 7160                      | -7.4                    | -15.3                 | 263                     | -3.5                    | -15.0                   |
|                       | (523 to 809)            | (-17.7 to 14.3)         | (-24.1 to 7.5)          | (5282 to 8198)            | (-20.1 to 6)            | (-27.3 to -2.8)       | (214 to 281)            | (-15.9 to 10.0)         | (-26.2 to -3.2)         |
| Slovenia              | 145                     | -18.0                   | -23.4                   | 1569                      | -19.1                   | -26.2                 | 81                      | -11.5                   | -25.2                   |
|                       | (123 to 168)            | (-30.7 to -4.3)         | (-36.6 to -9.4)         | (1371 to 1782)            | (-29.7 to -6.3)         | (-36 to -14.6)        | (76 to 86)              | (-22.2 to 1.7)          | (-34.4 to -13.8)        |
| <b>Eastern Europe</b> | <b>21930</b>            | <b>-18.4</b>            | <b>-21.1</b>            | <b>242922</b>             | <b>-26.2</b>            | <b>-28.3</b>          | <b>10907</b>            | <b>-23.5</b>            | <b>-27.5</b>            |
|                       | <b>(20770 to 23132)</b> | <b>(-23.3 to -13.4)</b> | <b>(-26.6 to -15.5)</b> | <b>(233739 to 252335)</b> | <b>(-28.8 to -23.3)</b> | <b>(-31 to -25.5)</b> | <b>(10748 to 11084)</b> | <b>(-26.1 to -20.7)</b> | <b>(-30.0 to -24.8)</b> |
| Belarus               | 1017                    | -15.4                   | -17.3                   | 12554                     | -22.8                   | -25.4                 | 568                     | -20.1                   | -24.8                   |
|                       | (869 to 1183)           | (-27.3 to -1.8)         | (-30.1 to -2.4)         | (11164 to 14141)          | (-31.9 to -13.1)        | (-34.4 to -15.5)      | (540 to 596)            | (-29 to -11)            | (-33.0 to -15.9)        |
| Estonia               | 130                     | -26.7                   | -26.9                   | 1471                      | -30.2                   | -31.6                 | 80                      | -23.3                   | -29.8                   |
|                       | (105 to 159)            | (-40.6 to -10.8)        | (-42.1 to -9.1)         | (1217 to 1769)            | (-42.8 to -15.3)        | (-44.2 to -16.8)      | (75 to 85)              | (-36.5 to -7.8)         | (-42.3 to -15.2)        |
| Latvia                | 148                     | -36.7                   | -34.5                   | 2015                      | -40.5                   | -38.7                 | 134                     | -34.3                   | -35.9                   |
|                       | (120 to 180)            | (-48.1 to -23.2)        | (-47.2 to -19)          | (1664 to 2422)            | (-50.9 to -28.1)        | (-49.9 to -24.6)      | (126 to 141)            | (-45.3 to -21.3)        | (-47.2 to -22.8)        |
| Lithuania             | 268                     | -44.4                   | -42.0                   | 4173                      | -45.0                   | -44.1                 | 284                     | -38.2                   | -41.5                   |
|                       | (235 to 305)            | (-51.2 to -36.2)        | (-50.2 to -31.6)        | (3709 to 4674)            | (-51.3 to -37.4)        | (-50.6 to -36.2)      | (271 to 297)            | (-44.9 to -30)          | (-47.8 to -33.6)        |
| Moldova               | 399                     | -23.5                   | -25.9                   | 5317                      | -27.8                   | -30.5                 | 223                     | -23.5                   | -28.5                   |
|                       | (350 to 455)            | (-33.4 to -11.6)        | (-36.2 to -13.3)        | (4822 to 5838)            | (-35.2 to -19.8)        | (-37.9 to -22)        | (211 to 234)            | (-30.9 to -15.6)        | (-35.6 to -21.1)        |
| Russia                | 16048                   | -11.9                   | -16.6                   | 164073                    | -19.9                   | -23.4                 | 6548                    | -16.7                   | -22.1                   |
|                       | (15093 to 17095)        | (-18.4 to -5.2)         | (-23.4 to -9.1)         | (158658 to 169649)        | (-22.7 to -17.1)        | (-26.2 to -20.6)      | (6431 to 6685)          | (-19.3 to -14)          | (-24.6 to -19.5)        |
| Ukraine               | 3920                    | -35.3                   | -35.1                   | 53319                     | -39                     | -39                   | 3070                    | -36.7                   | -38.0                   |
|                       | (3458 to 4394)          | (-42.7 to -26.2)        | (-43.0 to -25.1)        | (48559 to 58892)          | (-44.8 to -31.8)        | (-44.9 to -31.7)      | (2956 to 3186)          | (-42.2 to -29.9)        | (-43.4 to -31.0)        |
| High income           | 78737                   | 1.4                     | -7.4                    | 742813                    | 2.1                     | -7.0                  | 28609                   | 6.1                     | -8.3                    |
|                       | (76288 to 81254)        | (-1.8 to 4.7)           | (-10.5 to -4.2)         | (719395 to 767913)        | (-1.7 to 5.9)           | (-10.6 to -3.3)       | (28327 to 28966)        | (2.5 to 9.8)            | (-11.6 to -5.0)         |
| <b>Australasia</b>    | <b>1152</b>             | <b>8.9</b>              | <b>-6.0</b>             | <b>13238</b>              | <b>7.1</b>              | <b>-10.7</b>          | <b>506</b>              | <b>9.3</b>              | <b>-11.8</b>            |
|                       | <b>(984 to 1344)</b>    | <b>(-7.2 to 29.1)</b>   | <b>(-21.5 to 12.7)</b>  | <b>(11573 to 15127)</b>   | <b>(-7.4 to 23.1)</b>   | <b>(-22.8 to 2.8)</b> | <b>(491 to 522)</b>     | <b>(-4.2 to 24.6)</b>   | <b>(-23.2 to 0.8)</b>   |
| Australia             | 968                     | 13.0                    | -3.7                    | 11186                     | 9.9                     | -8.9                  | 424                     | 11.2                    | -10.5                   |

|                                  |                         |                       |                        |                           |                       |                         |                       |                       |                         |
|----------------------------------|-------------------------|-----------------------|------------------------|---------------------------|-----------------------|-------------------------|-----------------------|-----------------------|-------------------------|
|                                  | (801 to 1156)           | (-6.8 to 36.9)        | (-21.8 to 18.9)        | (9460 to 13114)           | (-7.5 to 29.2)        | (-23.6 to 7.5)          | (409 to 439)          | (-4.9 to 29.2)        | (-23.9 to 4.6)          |
| New Zealand                      | 185                     | -8.4                  | -15.0                  | 2052                      | -6.0                  | -18.7                   | 82                    | -0.3                  | -18.5                   |
|                                  | (163 to 212)            | (-21.2 to 6.0)        | (-28.4 to 0.2)         | (1864 to 2267)            | (-15.3 to 4.2)        | (-27 to -9.5)           | (78 to 86)            | (-9.5 to 10)          | (-26.2 to -9.9)         |
| <b>High-income Asia Pacific</b>  | <b>15490</b>            | <b>-0.1</b>           | <b>-7.4</b>            | <b>121991</b>             | <b>-6.7</b>           | <b>-15.2</b>            | <b>5174</b>           | <b>2.5</b>            | <b>-15.8</b>            |
|                                  | <b>(14526 to 16613)</b> | <b>(-6.7 to 7.0)</b>  | <b>(-14.3 to 0.4)</b>  | <b>(116437 to 128700)</b> | <b>(-11 to -1.7)</b>  | <b>(-19.4 to -10.6)</b> | <b>(5095 to 5262)</b> | <b>(-1.8 to 7.5)</b>  | <b>(-19.6 to -11.3)</b> |
| Brunei                           | 68                      | 33.0                  | 0.3                    | 627                       | 31.8                  | -4.5                    | 13                    | 37.4                  | -5.3                    |
|                                  | (53 to 85)              | (4.7 to 69.8)         | (-19.2 to 24.8)        | (520 to 752)              | (7.5 to 60.2)         | (-20.8 to 14.5)         | (11 to 15)            | (15 to 63.8)          | (-20 to 11.4)           |
| Japan                            | 11866                   | 2.7                   | -1.3                   | 90563                     | -4.7                  | -9.2                    | 3868                  | 5.3                   | -9.3                    |
|                                  | (11020 to 12806)        | (-4.7 to 11.2)        | (-10.0 to 8.8)         | (86462 to 95764)          | (-9.2 to 0.6)         | (-13.4 to -3.9)         | (3800 to 3946)        | (0.8 to 10.5)         | (-13.5 to -4.4)         |
| Singapore                        | 268                     | 3.7                   | -23.2                  | 2268                      | -2.8                  | -30.0                   | 77                    | 2.1                   | -32.2                   |
|                                  | (229 to 314)            | (-11.9 to 21.6)       | (-34.5 to -10.6)       | (2015 to 2575)            | (-14.7 to 10.1)       | (-38.4 to -20.3)        | (73 to 82)            | (-9.4 to 15.2)        | (-39.7 to -23.5)        |
| South Korea                      | 3288                    | -9.8                  | -24.2                  | 28533                     | -13.2                 | -31.4                   | 1216                  | -6.8                  | -34.3                   |
|                                  | (2825 to 3829)          | (-22.9 to 5.0)        | (-35.9 to -11.3)       | (25518 to 31784)          | (-22.8 to -3.0)       | (-39.1 to -23.1)        | (1177 to 1256)        | (-16.4 to 3.5)        | (-40.9 to -26.9)        |
| <b>High-income North America</b> | <b>23037</b>            | <b>13.4</b>           | <b>2.2</b>             | <b>228627</b>             | <b>13.4</b>           | <b>0.2</b>              | <b>7178</b>           | <b>17.5</b>           | <b>-0.1</b>             |
|                                  | <b>(21875 to 24240)</b> | <b>(7.4 to 20.1)</b>  | <b>(-3.8 to 8.7)</b>   | <b>(217630 to 239893)</b> | <b>(8.1 to 19.0)</b>  | <b>(-4.7 to 5.6)</b>    | <b>(7072 to 7294)</b> | <b>(12.5 to 22.6)</b> | <b>(-4.5 to 4.5)</b>    |
| Canada                           | 2275                    | 7.8                   | -3.0                   | 22590                     | 5.4                   | -8.4                    | 874                   | 9.5                   | -10.7                   |
|                                  | (1961 to 2611)          | (-7.0 to 23.8)        | (-17.9 to 13.5)        | (20296 to 25241)          | (-6.1 to 18.5)        | (-18.9 to 3.1)          | (841 to 908)          | (-0.9 to 21.9)        | (-19.8 to -0.2)         |
| Greenland                        | 7                       | -24.4                 | -26.6                  | 83                        | -26.2                 | -31.3                   | 3                     | -18.7                 | -29.6                   |
|                                  | (6 to 9)                | (-39.4 to -5.0)       | (-40.6 to -7.6)        | (69 to 104)               | (-39.3 to -9.1)       | (-43.2 to -16.0)        | (3 to 4)              | (-32.1 to -1.3)       | (-40.8 to -15.5)        |
| USA                              | 20755                   | 14.1                  | 2.8                    | 205951                    | 14.4                  | 1.3.0                   | 6301                  | 18.6                  | 1.2                     |
|                                  | (19628 to 21918)        | (7.5 to 21.1)         | (-3.5 to 9.9)          | (195837 to 216547)        | (8.5 to 20.4)         | (-4.3 to 7.0)           | (6206 to 6407)        | (13.2 to 24.1)        | (-3.7 to 6.1)           |
| <b>Southern Latin America</b>    | <b>10926</b>            | <b>14.3</b>           | <b>-2.1</b>            | <b>121469</b>             | <b>7.1</b>            | <b>-9.6</b>             | <b>4018</b>           | <b>7.2</b>            | <b>-11.5</b>            |
|                                  | <b>(9423 to 12650)</b>  | <b>(-1.7 to 33.4)</b> | <b>(-16.2 to 14.9)</b> | <b>(107025 to 137962)</b> | <b>(-6.4 to 22.2)</b> | <b>(-21.1 to 3.2)</b>   | <b>(3878 to 4170)</b> | <b>(-4.9 to 21)</b>   | <b>(-21.8 to 0.3)</b>   |
| Argentina                        | 7983                    | 18.4                  | 0.4                    | 88896                     | 9.8                   | -7.2                    | 2807                  | 7.9                   | -8.9                    |
|                                  | (6549 to 9618)          | (-3.4 to 44.5)        | (-18.5 to 23.4)        | (73917 to 104463)         | (-8.6 to 29.8)        | (-22.9 to 10.1)         | (2679 to 2949)        | (-8.8 to 26.1)        | (-23.3 to 6.7)          |
| Chile                            | 2302                    | 5.9                   | -11.1                  | 25173                     | 2.0                   | -18.0                   | 898                   | 8.0                   | -19.2                   |

|                       |                         |                      |                        |                           |                      |                        |                         |                      |                        |
|-----------------------|-------------------------|----------------------|------------------------|---------------------------|----------------------|------------------------|-------------------------|----------------------|------------------------|
|                       | (1885 to 2809)          | (-13.5 to 28)        | (-28.1 to 7.9)         | (21051 to 30076)          | (-14.9 to 21.5)      | (-31.6 to -2.3)        | (860 to 934)            | (-8.9 to 27.6)       | (-31.9 to -4.4)        |
| Uruguay               | 640                     | 0.5                  | -6.2                   | 7394                      | -4.2                 | -12.0                  | 313                     | -1.6                 | -12.7                  |
|                       | (522 to 768)            | (-18.3 to 20.9)      | (-24.9 to 14.4)        | (6184 to 8627)            | (-20.4 to 12.8)      | (-27.3 to 4.2)         | (296 to 331)            | (-17 to 14.7)        | (-26.9 to 2.1)         |
| <b>Western Europe</b> | <b>26183</b>            | <b>-2.4</b>          | <b>-7.3</b>            | <b>260403</b>             | <b>-4.3</b>          | <b>-11.9</b>           | <b>11733</b>            | <b>0.3</b>           | <b>-11.8</b>           |
|                       | <b>(24707 to 27712)</b> | <b>(-7.7 to 3.5)</b> | <b>(-12.4 to -0.9)</b> | <b>(246354 to 274976)</b> | <b>(-9.1 to 0.8)</b> | <b>(-16.3 to -7.2)</b> | <b>(11571 to 11922)</b> | <b>(-4.4 to 5.2)</b> | <b>(-16.1 to -7.3)</b> |
| Andorra               | 4                       | -4.2                 | -2.8                   | 38                        | 9.4                  | 1.6                    | 1.0                     | 22.9                 | 6.6                    |
|                       | (3 to 6)                | (-26.3 to 26.4)      | (-25 to 30.1)          | (30 to 49)                | (-12.2 to 39.0)      | (-18.3 to 29.6)        | (1 to 2)                | (-2.3 to 54.7)       | (-14.6 to 35.5)        |
| Austria               | 558                     | -6.6                 | -12.2                  | 5485                      | -8.1                 | -16.4                  | 259                     | -4.9                 | -16.3                  |
|                       | (494 to 631)            | (-17.9 to 6.5)       | (-24.1 to 2.5)         | (4943 to 6077)            | (-17.7 to 2.7)       | (-25.6 to -6.5)        | (247 to 272)            | (-14.4 to 5.8)       | (-25 to -6.6)          |
| Belgium               | 613                     | -13.5                | -20.6                  | 6503                      | -14.2                | -22.2                  | 330                     | -7.4                 | -19.6                  |
|                       | (534 to 700)            | (-25.1 to 0.3)       | (-32.8 to -6.5)        | (5782 to 7281)            | (-23.7 to -3.4)      | (-31.5 to -11.9)       | (317 to 344)            | (-17.1 to 3.5)       | (-28.2 to -9.9)        |
| Cyprus                | 57                      | 10.8                 | -16.8                  | 567                       | 5.0                  | -22.0                  | 20                      | 7.9                  | -23.1                  |
|                       | (46 to 69)              | (-9.9 to 36.5)       | (-32.5 to 2.9)         | (440 to 670)              | (-11.8 to 24.3)      | (-34.4 to -7.7)        | (16 to 23)              | (-9.8 to 27.1)       | (-35.6 to -9.2)        |
| Denmark               | 380                     | -14.2                | -17.2                  | 3883                      | -15.6                | -23.0                  | 202                     | -11.7                | -22.2                  |
|                       | (332 to 434)            | (-25 to -0.7)        | (-29.4 to -1.5)        | (3483 to 4346)            | (-25.1 to -4.5)      | (-31.9 to -11.9)       | (193 to 211)            | (-21.1 to -1.1)      | (-30.6 to -12.6)       |
| Finland               | 213                     | -2.0                 | -12.2                  | 2167                      | -1                   | -13.2                  | 102                     | 7.7                  | -9.4                   |
|                       | (186 to 242)            | (-15.9 to 13.2)      | (-25.9 to 3.1)         | (1927 to 2428)            | (-12.9 to 12.2)      | (-23.9 to -1.2)        | (96 to 108)             | (-5.1 to 21.3)       | (-20.0 to 2.5)         |
| France                | 3749                    | -4.8                 | -11.6                  | 39419                     | -5.6                 | -14.0                  | 1850                    | 1.2                  | -13.9                  |
|                       | (3249 to 4283)          | (-17.5 to 9.9)       | (-25.1 to 4.5)         | (35150 to 44082)          | (-16.2 to 6.0)       | (-24.0 to -2.8)        | (1779 to 1927)          | (-9.3 to 11.7)       | (-23.1 to -3.7)        |
| Germany               | 5662                    | 2.9                  | 1.6                    | 58000                     | -3.2                 | -7.2                   | 2544                    | 1.9                  | -6.4                   |
|                       | (4710 to 6761)          | (-13.3 to 23.0)      | (-16.6 to 24.4)        | (48697 to 68399)          | (-18.2 to 14.8)      | (-21.8 to 10.6)        | (2468 to 2624)          | (-13.3 to 19)        | (-20.7 to 10.2)        |
| Greece                | 702                     | 0.1                  | 0.8                    | 7525                      | 1.0                  | -0.5                   | 325                     | 3.6                  | -7.3                   |
|                       | (598 to 806)            | (-14.6 to 15.0)      | (-16 to 18.2)          | (6641 to 8402)            | (-10.9 to 13.9)      | (-12.8 to 12.9)        | (309 to 342)            | (-7.9 to 16.4)       | (-17.7 to 4.2)         |
| Iceland               | 12                      | 4.8                  | -8.8                   | 122                       | 3.9                  | -12.5                  | 5                       | 8.8                  | -12.7                  |
|                       | (11 to 14)              | (-10.8 to 23.0)      | (-23.6 to 8.5)         | (110 to 136)              | (-8.9 to 18.7)       | (-23.9 to 0.6)         | (4 to 5)                | (-3.8 to 22)         | (-22.6 to -1.5)        |
| Ireland               | 304                     | 1.3                  | -14                    | 2811                      | -0.6                 | -18.7                  | 98                      | 3.2                  | -17.9                  |

|             |                |                 |                  |                  |                  |                  |                |                 |                  |
|-------------|----------------|-----------------|------------------|------------------|------------------|------------------|----------------|-----------------|------------------|
|             | (255 to 360)   | (-14.8 to 22.2) | (-28.3 to 5.1)   | (2482 to 3188)   | (-12.8 to 14.2)  | (-28.7 to -6.7)  | (93 to 104)    | (-8.4 to 17.7)  | (-27.2 to -6.2)  |
| Israel      | 346            | 12.7            | -10.2            | 3560             | 6.9              | -15.9            | 134            | 10.7            | -16.9            |
|             | (296 to 407)   | (-3.9 to 31.3)  | (-24.6 to 5.0)   | (3158 to 3985)   | (-5.4 to 22.6)   | (-25.6 to -3.2)  | (127 to 142)   | (-1.2 to 24.4)  | (-25.8 to -6.5)  |
| Italy       | 3118           | -0.4            | -4.9             | 33146            | -0.7             | -8.5             | 1577           | 2.9             | -9.8             |
|             | (2708 to 3576) | (-13.9 to 14.1) | (-19.2 to 11.4)  | (29399 to 36958) | (-12 to 11.1)    | (-19.1 to 3.7)   | (1517 to 1641) | (-8.0 to 14.1)  | (-19.7 to 0.6)   |
| Luxembourg  | 28             | 6.0             | -15.2            | 270              | 4.3              | -16.9            | 11             | 7.6             | -15.2            |
|             | (23 to 33)     | (-14.8 to 30.0) | (-32.9 to 5.8)   | (225 to 319)     | (-13.9 to 24.6)  | (-31.6 to 0.1)   | (10 to 12)     | (-10.7 to 30.0) | (-29.9 to 2.3)   |
| Malta       | 18             | 9.5             | -3.0             | 201              | 6.2              | -8.3             | 8              | 15.3            | -8.2             |
|             | (16 to 21)     | (-5.7 to 27.3)  | (-18.4 to 14.6)  | (178 to 225)     | (-6.6 to 20.9)   | (-19.8 to 5.1)   | (7 to 8)       | (2.0 to 31.5)   | (-18.5 to 4.6)   |
| Netherlands | 882            | 2.2             | -1.6             | 8738             | 3.4              | -6.0             | 370            | 9.1             | -6.3             |
|             | (772 to 1017)  | (-12.1 to 17.5) | (-17.6 to 16.7)  | (7841 to 9673)   | (-7.6 to 15.1)   | (-16.4 to 5.3)   | (355 to 389)   | (-1.9 to 20.5)  | (-15.5 to 3.6)   |
| Norway      | 280            | -13.8           | -23.6            | 2601             | -14.9            | -26.7            | 129            | -10.7           | -22.9            |
|             | (257 to 305)   | (-21.1 to -5.2) | (-31.1 to -14.9) | (2465 to 2752)   | (-19.2 to -10.0) | (-30.5 to -22.2) | (126 to 133)   | (-15 to -5.9)   | (-26.8 to -18.8) |
| Portugal    | 941            | -20.7           | -28.8            | 8718             | -18.4            | -28.3            | 416            | -9.1            | -24.8            |
|             | (817 to 1080)  | (-31.7 to -8.4) | (-39.8 to -16.6) | (7691 to 9766)   | (-28.2 to -7.0)  | (-37.8 to -18.3) | (395 to 435)   | (-19.2 to 1.9)  | (-33.5 to -14.9) |
| Spain       | 2820           | -5.7            | -15.2            | 25451            | -3               | -15.4            | 1080           | 3.7             | -12.8            |
|             | (2453 to 3224) | (-17.8 to 8.7)  | (-27.4 to -1.6)  | (22988 to 28301) | (-13.2 to 8.2)   | (-24.5 to -5.0)  | (1042 to 1121) | (-5.9 to 15.1)  | (-21.4 to -3.4)  |
| Sweden      | 548            | -4.2            | -8.5             | 5652             | -6.5             | -14.1            | 306            | -8.4            | -15.5            |
|             | (492 to 608)   | (-14.1 to 7.9)  | (-20 to 5.5)     | (5168 to 6214)   | (-15.4 to 2.8)   | (-22.3 to -4.4)  | (292 to 320)   | (-16.7 to 0)    | (-23.4 to -7.6)  |
| Switzerland | 370            | -15.4           | -25.5            | 3908             | -16.2            | -28              | 218            | -11.8           | -26.5            |
|             | (324 to 424)   | (-27.2 to -3.2) | (-37.3 to -13.2) | (3500 to 4365)   | (-26.1 to -6.2)  | (-36.9 to -18.7) | (209 to 228)   | (-21.4 to -1.2) | (-35.1 to -17.5) |
| UK          | 4552           | 2.0             | -4.0             | 41367            | -2.9             | -9.7             | 1736           | -2.2            | -11.0            |
|             | (4377 to 4759) | (-2.1 to 6.4)   | (-8.5 to 0.8)    | (39924 to 42986) | (-5.8 to 0.4)    | (-12.5 to -6.5)  | (1707 to 1772) | (-4.9 to 1.1)   | (-13.6 to -8.0)  |
| England     | 3770           | 1.8             | -4.6             | 34105            | -2.8             | -10.0            | 1442           | -2.2            | -11.1            |
|             | (3611 to 3932) | (-2.5 to 6.2)   | (-9.2 to 0.4)    | (32981 to 35231) | (-5.5 to 0.3)    | (-12.6 to -6.9)  | (1414 to 1474) | (-5.0 to 0.9)   | (-13.5 to -8.3)  |
| Northern    | 122            | -2.9            | -11.0            | 1117             | -6.4             | -16.1            | 46             | -2.8            | -15.9            |

|                  |              |                       |                       |                        |                          |                      |                        |                       |                       |                        |
|------------------|--------------|-----------------------|-----------------------|------------------------|--------------------------|----------------------|------------------------|-----------------------|-----------------------|------------------------|
| Ireland          |              | (101 to 146)          | (-18.8 to 18.5)       | (-27.1 to 11.8)        | (954 to 1305)            | (-20.2 to 10.5)      | (-28.7 to -0.1)        | (43 to 49)            | (-17 to 12)           | (-28.2 to -1.8)        |
| Scotland         |              | 438                   | 12.2                  | 10.1                   | 4038                     | 2.9                  | -0.1                   | 150                   | 3.8                   | -3.5                   |
|                  |              | (377 to 511)          | (-3.9 to 31.7)        | (-8.2 to 32.5)         | (3540 to 4579)           | (-9.9 to 17.2)       | (-13.7 to 15)          | (143 to 157)          | (-8.4 to 17)          | (-15.1 to 9.8)         |
| Wales            |              | 221                   | -9.0                  | -12.6                  | 2107                     | -12.4                | -16.7                  | 97                    | -9.7                  | -17.0                  |
|                  |              | (191 to 259)          | (-23.3 to 7.1)        | (-28.8 to 6.6)         | (1864 to 2336)           | (-23.1 to -0.5)      | (-27.8 to -4.3)        | (92 to 104)           | (-20 to 1.6)          | (-26.8 to -6.2)        |
| <b>Andean</b>    | <b>Latin</b> | <b>7347</b>           | <b>12.4</b>           | <b>-15.6</b>           | <b>102588</b>            | <b>7.1</b>           | <b>-19.8</b>           | <b>3074</b>           | <b>12.8</b>           | <b>-18.0</b>           |
| <b>America</b>   |              | <b>(6216 to 8479)</b> | <b>(-3.7 to 31.0)</b> | <b>(-27.5 to -1.7)</b> | <b>(87071 to 117597)</b> | <b>(-7 to 23.3)</b>  | <b>(-30.3 to -7.7)</b> | <b>(2792 to 3362)</b> | <b>(-1.2 to 28.8)</b> | <b>(-28.1 to -6.4)</b> |
| Bolivia          |              | 1699                  | 14.3                  | -14.9                  | 26103                    | 9.7                  | -18.5                  | 760                   | 14.5                  | -16.3                  |
|                  |              | (1180 to 2253)        | (-12.2 to 47.4)       | (-34.1 to 8.7)         | (18479 to 34552)         | (-15 to 38.2)        | (-36.7 to 2.2)         | (597 to 953)          | (-10.2 to 42.0)       | (-34.0 to 3.4)         |
| Ecuador          |              | 1946                  | 16.3                  | -12.4                  | 26497                    | 11.3                 | -16.2                  | 783                   | 17.3                  | -15.0                  |
|                  |              | (1632 to 2281)        | (-3.3 to 41.0)        | (-27.1 to 5.6)         | (22808 to 30794)         | (-5.9 to 31.6)       | (-29 to -1.0)          | (724 to 847)          | (0.9 to 36.8)         | (-26.7 to -0.9)        |
| Peru             |              | 3702                  | 9.7                   | -17.6                  | 49987                    | 3.7                  | -22.3                  | 1531                  | 9.6                   | -20.6                  |
|                  |              | (2809 to 4669)        | (-15.1 to 39.6)       | (-36.1 to 4.9)         | (38857 to 62097)         | (-19.7 to 30.7)      | (-39.6 to -2.3)        | (1314 to 1728)        | (-13.8 to 36.9)       | (-37.2 to -1.1)        |
| <b>Caribbean</b> |              | <b>6705</b>           | <b>13.3</b>           | <b>-2.4</b>            | <b>96573</b>             | <b>12.2</b>          | <b>-4.9</b>            | <b>2633</b>           | <b>15.7</b>           | <b>-5.3</b>            |
|                  |              | <b>(5560 to 7824)</b> | <b>(1.3 to 26)</b>    | <b>(-12.8 to 8.6)</b>  | <b>(79167 to 113794)</b> | <b>(0.9 to 25.2)</b> | <b>(-14.6 to 6.3)</b>  | <b>(2264 to 2989)</b> | <b>(5.1 to 28)</b>    | <b>(-13.8 to 4.8)</b>  |
| Antigua          | and          | 11                    | 21.3                  | 4.3                    | 147                      | 21.4                 | 0.8                    | 4                     | 24.7                  | -0.1                   |
| Barbuda          |              | (10 to 13)            | (2.1 to 46.2)         | (-12.3 to 25.1)        | (129 to 166)             | (5.3 to 40.7)        | (-12.6 to 17.0)        | (4 to 4)              | (10.0 to 43.7)        | (-11.7 to 15)          |
| The Bahamas      |              | 63                    | 24.4                  | 4.3                    | 796                      | 26.8                 | 2.3                    | 18                    | 31.8                  | 1.9                    |
|                  |              | (52 to 76)            | (2.4 to 52.3)         | (-14 to 27.3)          | (676 to 931)             | (6.7 to 49.0)        | (-13.6 to 20.0)        | (17 to 20)            | (12.5 to 54.1)        | (-13.5 to 18.7)        |
| Barbados         |              | 59                    | 10.1                  | -5.6                   | 765                      | 13.2                 | -5.3                   | 24                    | 21.4                  | -1.2                   |
|                  |              | (50 to 69)            | (-8.5 to 31.7)        | (-22.2 to 14)          | (653 to 878)             | (-3.9 to 32.1)       | (-20 to 11.0)          | (22 to 26)            | (4.8 to 40.5)         | (-14.9 to 14.4)        |
| Belize           |              | 59                    | 30.2                  | -14.7                  | 799                      | 28.2                 | -17.3                  | 17                    | 30.2                  | -16.7                  |
|                  |              | (52 to 69)            | (11 to 54.7)          | (-26.2 to -0.5)        | (714 to 896)             | (13.4 to 46.0)       | (-26.4 to -6.0)        | (16 to 19)            | (16.2 to 46.7)        | (-25.3 to -6.6)        |
| Bermuda          |              | 4                     | -15.5                 | -24.9                  | 51                       | -17.8                | -28.9                  | 2                     | -7.6                  | -28.3                  |
|                  |              | (4 to 5)              | (-29.8 to 0.7)        | (-38.6 to -9.5)        | (44 to 60)               | (-30.9 to -3.0)      | (-40.4 to -16.2)       | (2 to 3)              | (-21.2 to 8.3)        | (-38.6 to -15.9)       |
| Cuba             |              | 1507                  | -7.3                  | -11.6                  | 19208                    | -5.7                 | -14.7                  | 643                   | 4.1                   | -11.8                  |

|                      |                |                 |                 |                  |                 |                 |               |                 |                 |
|----------------------|----------------|-----------------|-----------------|------------------|-----------------|-----------------|---------------|-----------------|-----------------|
|                      | (1248 to 1806) | (-23.5 to 11.6) | (-27.4 to 7.7)  | (16098 to 22730) | (-21.1 to 12.6) | (-29 to 1.9)    | (615 to 673)  | (-12.5 to 21.7) | (-25.8 to 3.6)  |
| Dominica             | 14             | 10.6            | 3.5             | 185              | 10.2            | 1.6             | 6             | 12.4            | 1.7             |
|                      | (12 to 16)     | (-6.8 to 30.2)  | (-13.3 to 23.3) | (163 to 209)     | (-4.9 to 25.8)  | (-13 to 16.7)   | (6 to 7)      | (-1.5 to 27.2)  | (-11.4 to 15.2) |
| Dominican            | 1208           | 26.9            | 2.8             | 15959            | 23.2            | -1.7            | 411           | 25.6            | -2.5            |
| Republic             | (943 to 1538)  | (-4.0 to 69.0)  | (-21.7 to 35.4) | (12428 to 20098) | (-5.6 to 58.8)  | (-24.6 to 26.1) | (352 to 484)  | (-2.6 to 59.3)  | (-24.3 to 23.4) |
| Grenada              | 20             | 9.3             | -2.1            | 274              | 9.8             | -3.3            | 8             | 23.7            | -1.7            |
|                      | (17 to 22)     | (-5.4 to 26.7)  | (-15.7 to 15.0) | (246 to 304)     | (-3.4 to 24.7)  | (-15.2 to 10.1) | (8 to 9)      | (9.7 to 40.0)   | (-12.9 to 10.9) |
| Guyana               | 131            | 8.5             | -1.8            | 1970             | 5.2             | -6.8            | 54            | 10.6            | -6.2            |
|                      | (104 to 162)   | (-13.8 to 35.5) | (-21.4 to 21.6) | (1606 to 2363)   | (-14.0 to 28.1) | (-23.6 to 12.6) | (50 to 58)    | (-8.1 to 32.9)  | (-22.1 to 12.2) |
| Haiti                | 2257           | 22.6            | -11.4           | 37940            | 17.4            | -14.6           | 903           | 17.7            | -13.6           |
|                      | (1362 to 3177) | (-3.2 to 53.5)  | (-29.0 to 9.2)  | (23427 to 52689) | (-6.2 to 44.5)  | (-31.2 to 5.0)  | (562 to 1221) | (-4.8 to 44.7)  | (-29.0 to 5.0)  |
| Jamaica              | 469            | 28.4            | 12.3            | 6420             | 28.1            | 10.2            | 171           | 26.4            | 7.8             |
|                      | (363 to 601)   | (-0.1 to 67.4)  | (-12.6 to 46.6) | (5068 to 8114)   | (0.4 to 64.0)   | (-13.3 to 41.0) | (161 to 183)  | (1.2 to 58.4)   | (-14.1 to 35.0) |
| Puerto Rico          | 292            | 9.5             | 6.5             | 3407             | 8.4             | 2               | 118           | 14.5            | -1.0            |
|                      | (252 to 336)   | (-5.5 to 27.4)  | (-10.2 to 26.6) | (3021 to 3840)   | (-4.4 to 23.9)  | (-10.4 to 17.2) | (111 to 125)  | (1.7 to 29.4)   | (-12.4 to 12.1) |
| Saint Lucia          | 31             | 25.9            | 0.1             | 431              | 25.9            | -2.9            | 11            | 29.8            | -2.0            |
|                      | (27 to 36)     | (4.9 to 48.0)   | (-16.3 to 17.2) | (379 to 489)     | (8.2 to 45.1)   | (-16.6 to 12.4) | (10 to 12)    | (13.4 to 47.1)  | (-14.3 to 11.2) |
| Saint Vincent and    | 28             | 18.0            | 2.3             | 389              | 21.1            | 1.8             | 10            | 24.1            | 1.9             |
| the Grenadines       | (24 to 33)     | (-0.9 to 39.5)  | (-14.5 to 21.2) | (343 to 441)     | (4.9 to 38.7)   | (-12 to 16.8)   | (9 to 11)     | (8.9 to 39.8)   | (-10.8 to 15.0) |
| Suriname             | 102            | 16.9            | -4.6            | 1449             | 12.4            | -10.7           | 39            | 18.2            | -11.0           |
|                      | (85 to 121)    | (-4.8 to 42.2)  | (-22.4 to 15.8) | (1241 to 1702)   | (-7.5 to 34.2)  | (-25.7 to 6.1)  | (35 to 43)    | (-0.8 to 38.9)  | (-25.0 to 4.2)  |
| Trinidad and         | 195            | 3.1             | -13.9           | 2718             | 1.1             | -17             | 92            | 6.9             | -17.3           |
| Tobago               | (141 to 262)   | (-26.2 to 41.2) | (-38.8 to 18.2) | (2012 to 3593)   | (-26.2 to 35.7) | (-39.4 to 11.8) | (87 to 98)    | (-19.8 to 40.6) | (-38.1 to 8.7)  |
| Virgin Islands       | 15             | 2.7             | -2.2            | 194              | 4.2             | -3.2            | 6             | 14.9            | -3.2            |
|                      | (12 to 18)     | (-15.2 to 23.9) | (-21.1 to 21.3) | (162 to 230)     | (-11.7 to 23.6) | (-19.3 to 16.8) | (6 to 7)      | (-1.7 to 34.0)  | (-17.1 to 14.1) |
| <b>Central Latin</b> | <b>26756</b>   | <b>16.8</b>     | <b>-11.7</b>    | <b>353069</b>    | <b>12.4</b>     | <b>-16.5</b>    | <b>9870</b>   | <b>15.1</b>     | <b>-18.4</b>    |



|                         |                         |                       |                        |                           |                      |                         |                        |                      |                         |
|-------------------------|-------------------------|-----------------------|------------------------|---------------------------|----------------------|-------------------------|------------------------|----------------------|-------------------------|
| <b>America</b>          | <b>(25148 to 28660)</b> | <b>(9.5 to 25.2)</b>  | <b>(-17 to -5.6)</b>   | <b>(333387 to 373695)</b> | <b>(6.2 to 19.6)</b> | <b>(-21.1 to -11.2)</b> | <b>(9700 to 10057)</b> | <b>(9.0 to 22.2)</b> | <b>(-22.6 to -13.6)</b> |
| Colombia                | 4813                    | 5.4                   | -18.8                  | 62111                     | 0.1                  | -24.4                   | 1981                   | 5.5                  | -26.5                   |
|                         | (3970 to 5835)          | (-13.3 to 27.7)       | (-33.2 to -1.5)        | (52085 to 73451)          | (-15.5 to 19)        | (-36.3 to -10.0)        | (1909 to 2054)         | (-10.6 to 23.2)      | (-37.5 to -13.9)        |
| Costa Rica              | 448                     | 48.4                  | 15.2                   | 5491                      | 41.2                 | 8.2                     | 128                    | 47.5                 | 6.4                     |
|                         | (387 to 521)            | (25.5 to 75.8)        | (-2.3 to 35.7)         | (4880 to 6161)            | (22.4 to 62.1)       | (-6.2 to 24.3)          | (121 to 137)           | (28.3 to 68.1)       | (-7.4 to 21.7)          |
| El Salvador             | 971                     | -2.3                  | -18.8                  | 13188                     | -4.7                 | -22                     | 454                    | -0.8                 | -20.7                   |
|                         | (709 to 1282)           | (-27.4 to 28.8)       | (-39.7 to 6.8)         | (9897 to 17063)           | (-26.8 to 24.4)      | (-40.2 to 1.8)          | (370 to 497)           | (-23.1 to 27.8)      | (-38.6 to 2.5)          |
| Guatemala               | 1901                    | 30.8                  | -11.0                  | 28092                     | 26.5                 | -13.4                   | 668                    | 29.4                 | -13.7                   |
|                         | (1558 to 2287)          | (8.5 to 57.2)         | (-25.2 to 6.5)         | (23537 to 33176)          | (6.1 to 50.3)        | (-27.0 to 2.7)          | (635 to 706)           | (9.8 to 51.9)        | (-26.4 to 1.0)          |
| Honduras                | 367                     | 32.8                  | -7.9                   | 4917                      | 29.6                 | -10.7                   | 109                    | 36.9                 | -6.8                    |
|                         | (237 to 670)            | (-8.7 to 85.4)        | (-36.0 to 26.8)        | (3252 to 9156)            | (-7.5 to 79.5)       | (-36.0 to 21.8)         | (75 to 188)            | (-2.3 to 84.7)       | (-32.6 to 24.5)         |
| Mexico                  | 11896                   | 17.1                  | -11.7                  | 159023                    | 12.7                 | -16.7                   | 4574                   | 13.6                 | -19.3                   |
|                         | (11425 to 12413)        | (12.0 to 22.5)        | (-15.5 to -7.7)        | (153369 to 165325)        | (8.5 to 17.4)        | (-19.8 to -13.2)        | (4484 to 4654)         | (9.4 to 18.2)        | (-22.3 to -16.1)        |
| Nicaragua               | 767                     | 8.3                   | -20.6                  | 10340                     | 5.1                  | -23.9                   | 290                    | 10.8                 | -21.9                   |
|                         | (620 to 961)            | (-15 to 37.3)         | (-37.1 to 0.0)         | (8432 to 12499)           | (-15.2 to 29.4)      | (-38.2 to -6.6)         | (255 to 329)           | (-9.4 to 33.9)       | (-36.1 to -6.3)         |
| Panama                  | 478                     | 25.9                  | -2.3                   | 5944                      | 18.2                 | -10.3                   | 161                    | 20.1                 | -13.3                   |
|                         | (407 to 554)            | (6.4 to 48.7)         | (-17.3 to 15.2)        | (5191 to 6747)            | (1.9 to 35)          | (-22.5 to 2.7)          | (153 to 168)           | (5.0 to 35.9)        | (-24.3 to -2.0)         |
| Venezuela               | 5114                    | 25.5                  | -4.3                   | 63963                     | 21.9                 | -8.3                    | 1505                   | 26.9                 | -8.2                    |
|                         | (3872 to 6583)          | (-3.6 to 61.2)        | (-25.6 to 22.1)        | (50547 to 79094)          | (-3.8 to 51.9)       | (-27.5 to 14.4)         | (1447 to 1566)         | (1.5 to 57.2)        | (-26.4 to 13.4)         |
| <b>Tropical Latin</b>   | <b>24126</b>            | <b>17.6</b>           | <b>-8.1</b>            | <b>316023</b>             | <b>11.7</b>          | <b>-14.1</b>            | <b>8977</b>            | <b>13.6</b>          | <b>-16.5</b>            |
| <b>America</b>          | <b>(23143 to 25222)</b> | <b>(12.3 to 23.7)</b> | <b>(-12.2 to -3.3)</b> | <b>(305123 to 329010)</b> | <b>(7.3 to 16.6)</b> | <b>(-17.5 to -10.3)</b> | <b>(8773 to 9170)</b>  | <b>(9.4 to 18.4)</b> | <b>(-19.6 to -13.0)</b> |
| Brazil                  | 23005                   | 17.9                  | -7.7                   | 300598                    | 11.9                 | -13.9                   | 8543                   | 13.8                 | -16.5                   |
|                         | (22072 to 23992)        | (12.6 to 23.7)        | (-11.8 to -3.3)        | (290268 to 312418)        | (7.7 to 16.7)        | (-17.1 to -10.2)        | (8349 to 8735)         | (9.6 to 18.6)        | (-19.5 to -13)          |
| Paraguay                | 1121                    | 12.2                  | -15.1                  | 15425                     | 7.8                  | -18.5                   | 434                    | 10.3                 | -17.3                   |
|                         | (794 to 1485)           | (-19.5 to 47.4)       | (-39.0 to 10.9)        | (11161 to 19986)          | (-21.3 to 41.5)      | (-40.4 to 6.4)          | (363 to 486)           | (-17.8 to 42.1)      | (-38.0 to 6.0)          |
| <b>North Africa and</b> | <b>14577</b>            | <b>20.3</b>           | <b>-13.2</b>           | <b>187684</b>             | <b>14.7</b>          | <b>-17.9</b>            | <b>4935</b>            | <b>17.7</b>          | <b>-16.8</b>            |

| <b>Middle East</b> | <b>(12548 to 16180)</b> | <b>(11.3 to 31.2)</b>   | <b>(-19.3 to -5.9)</b>    | <b>(159194 to 208843)</b> | <b>(6.8 to 24.4)</b>    | <b>(-23.5 to -11.4)</b>   | <b>(4330 to 5410)</b> | <b>(9.8 to 26.9)</b>     | <b>(-22.3 to -10.5)</b>   |
|--------------------|-------------------------|-------------------------|---------------------------|---------------------------|-------------------------|---------------------------|-----------------------|--------------------------|---------------------------|
| Afghanistan        | 1490<br>(648 to 2300)   | 22.6<br>(-6.5 to 66.5)  | -11.2<br>(-30.5 to 15.8)  | 24265<br>(10394 to 36592) | 20.0<br>(-5.4 to 58.7)  | -16.8<br>(-32.1 to 6.3)   | 536<br>(204 to 803)   | 17.7<br>(-4.1 to 50.1)   | -15.3<br>(-29.3 to 5)     |
| Algeria            | 1923<br>(1534 to 2336)  | 21.0<br>(-2.1 to 49.2)  | -13.6<br>(-29.1 to 5.2)   | 23489<br>(19482 to 27485) | 13.9<br>(-3.7 to 36.0)  | -19.4<br>(-31.5 to -4.5)  | 615<br>(523 to 701)   | 15.4<br>(-1.4 to 37.1)   | -19.1<br>(-30.8 to -4.8)  |
| Bahrain            | 22<br>(18 to 27)        | 45.5<br>(16.0 to 79.4)  | -19.1<br>(-33.7 to -1.8)  | 261<br>(219 to 318)       | 43.7<br>(18.6 to 75.0)  | -24.3<br>(-36.6 to -9.0)  | 5.0<br>(5 to 7)       | 50.0<br>(24.9 to 81.2)   | -23.4<br>(-36.1 to -8.3)  |
| Egypt              | 1192<br>(920 to 1543)   | 29.5<br>(1.8 to 68.8)   | -0.5<br>(-20.5 to 26.3)   | 15065<br>(12003 to 18768) | 21.8<br>(-2.0 to 50.5)  | -6.1<br>(-23.6 to 14.2)   | 357<br>(316 to 406)   | 25.7<br>(3.4 to 52.2)    | -3.9<br>(-19.8 to 15.2)   |
| Iran               | 1839<br>(1466 to 2076)  | 32.9<br>(17.2 to 49.7)  | -1.8<br>(-12.2 to 8.9)    | 20993<br>(16868 to 22533) | 33.1<br>(21.8 to 42.7)  | -3.9<br>(-12.6 to 2.6)    | 507<br>(439 to 531)   | 43.2<br>(29.3 to 53)     | 1.0<br>(-9.6 to 8.0)      |
| Iraq               | 416<br>(336 to 512)     | 1.1<br>(-30.8 to 47.7)  | -34.6<br>(-54.1 to -7.1)  | 5636<br>(4670 to 6812)    | -1.9<br>(-31.5 to 40.2) | -37.3<br>(-55.7 to -11.9) | 164<br>(130 to 223)   | 2.5<br>(-27.4 to 42.5)   | -36.1<br>(-54.1 to -13.2) |
| Jordan             | 125<br>(94 to 168)      | 18.6<br>(-9.2 to 60.6)  | -36.2<br>(-50.8 to -14.2) | 1482<br>(1139 to 1961)    | 14.2<br>(-12.2 to 50.6) | -40.5<br>(-53.9 to -20.8) | 39<br>(34 to 45)      | 22.4<br>(-5.3 to 64.1)   | -36.9<br>(-50.9 to -16.3) |
| Kuwait             | 54<br>(44 to 67)        | 28.4<br>(3.2 to 58.9)   | -44.7<br>(-53.8 to -33.8) | 515<br>(447 to 594)       | 18.4<br>(1.2 to 39.5)   | -48.7<br>(-55.5 to -40.7) | 12<br>(11 to 13)      | 14.7<br>(-0.1 to 33.2)   | -48.2<br>(-54.6 to -40.3) |
| Greenland          | 253<br>(201 to 318)     | 36.0<br>(9.3 to 69.7)   | -8.4<br>(-25.7 to 12.3)   | 2505<br>(2088 to 3047)    | 24.5<br>(3 to 48.9)     | -15.4<br>(-29.6 to 1)     | 64<br>(56 to 73)      | -18.7<br>(-32.1 to -1.3) | -12.4<br>(-26.1 to 3.2)   |
| Libya              | 334<br>(232 to 453)     | 62.1<br>(16 to 112.6)   | 8.6<br>(-18.9 to 40.9)    | 3759<br>(2740 to 4858)    | 55.2<br>(16.7 to 98.8)  | 0.6<br>(-22.5 to 28.3)    | 69<br>(57 to 83)      | 53.8<br>(17.7 to 95.8)   | 1.6<br>(-21 to 30.1)      |
| Morocco            | 2272<br>(1640 to 3085)  | 11.6<br>(-12.8 to 43.5) | -13.2<br>(-31.5 to 10.7)  | 31984<br>(23145 to 42220) | 5.3<br>(-16.3 to 33)    | -19.5<br>(-35.8 to 0.5)   | 923<br>(721 to 1099)  | 9.5<br>(-12.5 to 38.7)   | -18<br>(-34.2 to 3.5)     |
| Oman               | 77<br>(55 to 102)       | 39.5<br>(3.3 to 87.2)   | -20.8<br>(-38.6 to -0.2)  | 790<br>(595 to 1005)      | 30.4<br>(2.2 to 66.2)   | -24.4<br>(-39.3 to -6.6)  | 17<br>(13 to 22)      | 34.6<br>(9 to 64.5)      | -20.2<br>(-33.6 to -4.8)  |
| Palestine          | 63                      | 27.1                    | -14.4                     | 825                       | 24.2                    | -16.9                     | 23                    | 21.9                     | -17.3                     |

|                      |                           |                       |                       |                             |                       |                      |                         |                       |                      |
|----------------------|---------------------------|-----------------------|-----------------------|-----------------------------|-----------------------|----------------------|-------------------------|-----------------------|----------------------|
|                      | (47 to 77)                | (2.4 to 64.2)         | (-29.9 to 9.9)        | (624 to 981)                | (2.4 to 58)           | (-31.4 to 5.7)       | (19 to 26)              | (1.1 to 55.1)         | (-31.4 to 5.7)       |
| Qatar                | 23                        | 97.6                  | -22.6                 | 228                         | 77.8                  | -27.9                | 4                       | 74.5                  | -29                  |
|                      | (16 to 30)                | (50.3 to 154.0)       | (-38.8 to -4.0)       | (172 to 297)                | (41 to 121.6)         | (-42.2 to -10.7)     | (3 to 5)                | (39.9 to 115.9)       | (-41.9 to -12.2)     |
| Saudi Arabia         | 434                       | 69.2                  | -3.1                  | 4348                        | 43.0                  | -14.5                | 90                      | 30.4                  | -16.5                |
|                      | (312 to 609)              | (25.6 to 131.0)       | (-22.7 to 25.1)       | (3293 to 5837)              | (10.6 to 86.4)        | (-30.8 to 5.8)       | (77 to 105)             | (3.7 to 64.0)         | (-31.3 to 1.5)       |
| Sudan                | 697                       | 20.3                  | -12.9                 | 9644                        | 13.0                  | -17.8                | 251                     | 11.7                  | -16.7                |
|                      | (415 to 1008)             | (-8.8 to 57.9)        | (-31.6 to 11.5)       | (5691 to 13807)             | (-12.2 to 44.6)       | (-34.9 to 4.8)       | (148 to 363)            | (-10.2 to 40.9)       | (-32.8 to 4.9)       |
| Syria                | 243                       | 9.2                   | -4.8                  | 3051                        | 9.9                   | -10.8                | 83                      | 17.8                  | -10.2                |
|                      | (175 to 330)              | (-22.2 to 47.6)       | (-30.4 to 25.8)       | (2231 to 3925)              | (-20 to 44.0)         | (-33.6 to 14.9)      | (70 to 97)              | (-10.8 to 49.7)       | (-31.1 to 12.1)      |
| Tunisia              | 365                       | 9.6                   | -14.8                 | 4075                        | 9.1                   | -18.2                | 125                     | 16.1                  | -16.1                |
|                      | (252 to 499)              | (-20.6 to 47.8)       | (-38.1 to 14.2)       | (2912 to 5434)              | (-19.3 to 43.3)       | (-39.5 to 7.6)       | (97 to 161)             | (-13.3 to 50.1)       | (-36.8 to 8.4)       |
| Turkey               | 1877                      | -1.4                  | -23.9                 | 22811                       | -5.1                  | -28.3                | 801                     | 1.4                   | -26.5                |
|                      | (1548 to 2275)            | (-18.9 to 21.4)       | (-37.1 to -6.9)       | (19188 to 26857)            | (-20 to 14.7)         | (-39.6 to -13.5)     | (716 to 901)            | (-14.1 to 20.9)       | (-37.8 to -12.5)     |
| United Arab Emirates | 182                       | 123.2                 | -13.6                 | 2132                        | 118.8                 | -17.2                | 28                      | 111                   | -17.8                |
|                      | (126 to 259)              | (66.3 to 192.9)       | (-31.1 to 7.1)        | (1526 to 2903)              | (70.1 to 176.5)       | (-33.8 to 1.9)       | (23 to 35)              | (66.4 to 163.1)       | (-34 to 1.1)         |
| Yemen                | 684                       | 36.6                  | -10.2                 | 9648                        | 28.8                  | -14.3                | 215                     | 29.5                  | -13.1                |
|                      | (401 to 992)              | (8.9 to 77)           | (-27.3 to 13.9)       | (5877 to 13924)             | (4.8 to 62)           | (-29.3 to 6.7)       | (134 to 301)            | (7 to 60.4)           | (-27.8 to 6.9)       |
| <b>South Asia</b>    | <b>117544</b>             | <b>36.9</b>           | <b>4.0</b>            | <b>1769489</b>              | <b>32.3</b>           | <b>-0.7</b>          | <b>38774</b>            | <b>36.5</b>           | <b>-0.5</b>          |
|                      | <b>(107899 to 136180)</b> | <b>(25.4 to 48.4)</b> | <b>(-4.3 to 12.5)</b> | <b>(1620354 to 2099212)</b> | <b>(22.0 to 42.9)</b> | <b>(-8.4 to 7.3)</b> | <b>(35483 to 45926)</b> | <b>(26.5 to 47.1)</b> | <b>(-7.9 to 7.2)</b> |
| Bangladesh           | 8873                      | 8.6                   | -21.7                 | 127944                      | 4.4                   | -27                  | 3304                    | 11.8                  | -25.3                |
|                      | (6278 to 12269)           | (-15.0 to 36.7)       | (-37.8 to -2.2)       | (89564 to 170935)           | (-16.3 to 29.2)       | (-40.9 to -9.3)      | (2293 to 3907)          | (-9.3 to 38.0)        | (-39.1 to -7.4)      |
| Bhutan               | 44                        | 30.0                  | -16.9                 | 605                         | 15.1                  | -23.6                | 15                      | 14.6                  | -22.6                |
|                      | (26 to 64)                | (-2.3 to 68.1)        | (-35.9 to 5.9)        | (385 to 852)                | (-10.4 to 45.3)       | (-40.1 to -4.2)      | (11 to 20)              | (-8.7 to 43.3)        | (-37.7 to -4.0)      |
| India                | 98979                     | 41.4                  | 8.9                   | 1504989                     | 36.7                  | 4.1                  | 32307                   | 40.6                  | 3.7                  |
|                      | (89368 to 120933)         | (28.1 to 54.3)        | (-1.4 to 18.5)        | (1363845 to 1868222)        | (24.2 to 48.3)        | (-5.4 to 13)         | (29462 to 40044)        | (28.3 to 51.9)        | (-5.4 to 12.0)       |
| Nepal                | 1981                      | 32.5                  | -1.3                  | 30738                       | 25.5                  | -6.9                 | 707                     | 29.4                  | -6.0                 |

|                                   |                          |                      |                        |                            |                      |                        |                         |                      |                        |
|-----------------------------------|--------------------------|----------------------|------------------------|----------------------------|----------------------|------------------------|-------------------------|----------------------|------------------------|
|                                   | (1342 to 2749)           | (5.6 to 67)          | (-21 to 23.4)          | (21362 to 42197)           | (1.5 to 57.2)        | (-25 to 16.7)          | (507 to 941)            | (5.7 to 60.1)        | (-22.9 to 15.2)        |
| Pakistan                          | 7667                     | 24.3                 | -12.8                  | 105213                     | 17.7                 | -17.3                  | 2440                    | 18.3                 | -15.8                  |
|                                   | (5389 to 10891)          | (-9.3 to 64.6)       | (-35 to 13.5)          | (74541 to 147656)          | (-12.5 to 52.2)      | (-37.7 to 5.1)         | (1967 to 3044)          | (-10.4 to 50)        | (-35.1 to 5.4)         |
| <b>East Asia</b>                  | <b>113036</b>            | <b>42.0</b>          | <b>17.6</b>            | <b>1423547</b>             | <b>35.1</b>          | <b>7.2</b>             | <b>33281</b>            | <b>44.5</b>          | <b>8.9</b>             |
|                                   | <b>(73551 to 122613)</b> | <b>(7.9 to 54.5)</b> | <b>(-10.9 to 27.8)</b> | <b>(923640 to 1544767)</b> | <b>(1.3 to 46.1)</b> | <b>(-19.7 to 15.8)</b> | <b>(29153 to 34581)</b> | <b>(9.2 to 56.0)</b> | <b>(-17.5 to 17.6)</b> |
| China                             | 106128                   | 44.7                 | 19.7                   | 1341894                    | 37.1                 | 8.6                    | 30826                   | 47.0                 | 10.6                   |
|                                   | (66519 to 115354)        | (8.6 to 57.8)        | (-10.3 to 30.5)        | (841256 to 1461438)        | (1.7 to 48.8)        | (-19.6 to 17.5)        | (26723 to 32113)        | (9.7 to 58.9)        | (-17.3 to 19.6)        |
| North Korea                       | 3136                     | 10.1                 | -2.3                   | 38999                      | 8.9                  | -5.6                   | 1075                    | 13.1                 | -5.2                   |
|                                   | (2108 to 4369)           | (-14.3 to 43.0)      | (-24.4 to 26.0)        | (26498 to 53576)           | (-13 to 37.7)        | (-24.5 to 18.8)        | (733 to 1504)           | (-7.8 to 39.8)       | (-23.2 to 16.6)        |
| Taiwan                            | 1951                     | -7.0                 | -25.7                  | 19722                      | -10.9                | -30.1                  | 834                     | -4.3                 | -31.6                  |
| (province of<br>China)            | (1713 to 2215)           | (-18.3 to 5.7)       | (-34.9 to -15.1)       | (17825 to 21841)           | (-20.2 to -1)        | (-37.4 to -21.9)       | (806 to 863)            | (-13.9 to 5.6)       | (-38.4 to -24.2)       |
| <b>Oceania</b>                    | <b>2325</b>              | <b>28.2</b>          | <b>-5.4</b>            | <b>32058</b>               | <b>25.9</b>          | <b>-7.8</b>            | <b>639</b>              | <b>27.6</b>          | <b>-7.0</b>            |
|                                   | <b>(1583 to 3172)</b>    | <b>(2.9 to 60.4)</b> | <b>(-21.3 to 14.7)</b> | <b>(22840 to 42233)</b>    | <b>(5 to 53.3)</b>   | <b>(-21.6 to 9.5)</b>  | <b>(493 to 818)</b>     | <b>(8.6 to 51.1)</b> | <b>(-19.0 to 7.2)</b>  |
| American Samoa                    | 5                        | 14.1                 | 10.5                   | 53                         | 15.3                 | 7.4                    | 1                       | 19.3                 | 3.8                    |
|                                   | (4 to 6)                 | (-8.7 to 41)         | (-10.5 to 34)          | (43 to 63)                 | (-3.6 to 38.5)       | (-9.5 to 28.1)         | (1 to 1)                | (1.4 to 41.5)        | (-10.9 to 20.6)        |
| Federated States<br>of Micronesia | 14                       | 6.3                  | -3.9                   | 191                        | 3.8                  | -7.4                   | 5                       | 6.3                  | -7.4                   |
|                                   | (8 to 21)                | (-30.5 to 42.1)      | (-36.2 to 26.6)        | (115 to 281)               | (-27.9 to 36.1)      | (-34.2 to 20.2)        | (4 to 7)                | (-19.1 to 34.5)      | (-27.2 to 15.5)        |
| Fiji                              | 196                      | 10.5                 | -2.9                   | 2594                       | 7.9                  | -6.1                   | 69                      | 14.4                 | -4.0                   |
|                                   | (101 to 256)             | (-16.8 to 41.9)      | (-25.8 to 22.6)        | (1331 to 3332)             | (-15.5 to 36.3)      | (-26.4 to 18.6)        | (38 to 76)              | (-9.6 to 42.6)       | (-23.1 to 18.4)        |
| Guam                              | 14                       | 13.9                 | 7.9                    | 156                        | 19.5                 | 10                     | 4                       | 30.0                 | 11.7                   |
|                                   | (11 to 17)               | (-9.6 to 39.7)       | (-14.3 to 31.8)        | (129 to 184)               | (-0.7 to 42.7)       | (-8.2 to 30.8)         | (3 to 4)                | (9.4 to 52.5)        | (-5.9 to 30.7)         |
| Kiribati                          | 43                       | 20.9                 | -2.2                   | 665                        | 18.6                 | -4.2                   | 16                      | 20.2                 | -3.1                   |
|                                   | (31 to 57)               | (-4.2 to 48.3)       | (-21.1 to 18.4)        | (489 to 878)               | (-4.3 to 43.8)       | (-21.3 to 15.1)        | (13 to 20)              | (-0.7 to 43.3)       | (-18.8 to 14.9)        |
| Marshall Islands                  | 11                       | 8.5                  | -11.7                  | 138                        | 5.2                  | -15.2                  | 3                       | 8.7                  | -14.3                  |
|                                   | (6 to 15)                | (-16.3 to 43.4)      | (-30.3 to 12.2)        | (75 to 192)                | (-16.2 to 32.8)      | (-31.1 to 5.1)         | (2 to 4)                | (-11.8 to 35.1)      | (-28.2 to 3.7)         |

|                       |                         |                      |                        |                           |                       |                         |                         |                      |                         |
|-----------------------|-------------------------|----------------------|------------------------|---------------------------|-----------------------|-------------------------|-------------------------|----------------------|-------------------------|
| Northern              | 7                       | -14.6                | -3.1                   | 77                        | -0.9                  | -0.8                    | 2                       | 17.6                 | -2.0                    |
| Mariana Islands       | (5 to 9)                | (-36 to 11.2)        | (-22.6 to 21.1)        | (62 to 94)                | (-19.9 to 22.6)       | (-17.1 to 21.1)         | (2 to 2)                | (-3.3 to 43.6)       | (-16.6 to 16.5)         |
| Papua New Guinea      | 1744                    | 33.1                 | -7.9                   | 24107                     | 30.5                  | -10.5                   | 448                     | 32.0                 | -9.6                    |
|                       | (1067 to 2549)          | (0.8 to 78.0)        | (-27.5 to 18.2)        | (15563 to 33951)          | (3.4 to 67.5)         | (-27.4 to 11.6)         | (315 to 619)            | (6.5 to 66.1)        | (-24.4 to 9.3)          |
| Samoa                 | 18                      | 9.9                  | 1.2                    | 228                       | 9.9                   | -0.2                    | 6                       | 13.2                 | 0.5                     |
|                       | (12 to 25)              | (-20.5 to 43.0)      | (-26.5 to 30.4)        | (152 to 310)              | (-17.5 to 39.2)       | (-24.5 to 25.1)         | (4 to 8)                | (-12.1 to 38.5)      | (-21.5 to 23.6)         |
| Solomon Islands       | 90                      | 30.8                 | -6.4                   | 1289                      | 26.8                  | -10                     | 26                      | 26.4                 | -10.0                   |
|                       | (60 to 132)             | (0.1 to 70.0)        | (-26.1 to 18.5)        | (899 to 1780)             | (0.7 to 59.7)         | (-26.6 to 10.6)         | (20 to 35)              | (3.6 to 54.6)        | (-24.4 to 7.0)          |
| Tonga                 | 16                      | 4.9                  | -5.8                   | 207                       | 2.3                   | -9.1                    | 7                       | 5.4                  | -9.6                    |
|                       | (12 to 20)              | (-18.1 to 29.2)      | (-25.8 to 16.2)        | (159 to 260)              | (-18 to 23.9)         | (-26.9 to 9.9)          | (6 to 8)                | (-14.0 to 26.2)      | (-26.1 to 7.8)          |
| Vanuatu               | 41                      | 22.0                 | -6.3                   | 588                       | 18.6                  | -9.0                    | 13                      | 23.3                 | -8.1                    |
|                       | (24 to 76)              | (-8.3 to 61.0)       | (-26.8 to 19.6)        | (348 to 1080)             | (-6.2 to 51.6)        | (-26.3 to 13.8)         | (8 to 24)               | (0.4 to 52.7)        | (-22.7 to 11.3)         |
| <b>Southeast Asia</b> | <b>62047</b>            | <b>9.0</b>           | <b>-14.5</b>           | <b>806446</b>             | <b>2.9</b>            | <b>-20.3</b>            | <b>23822</b>            | <b>7.8</b>           | <b>-19.2</b>            |
|                       | <b>(52363 to 69261)</b> | <b>(0.6 to 20.4)</b> | <b>(-20.9 to -6.2)</b> | <b>(674759 to 906591)</b> | <b>(-4.4 to 12.9)</b> | <b>(-25.9 to -13.1)</b> | <b>(19745 to 26867)</b> | <b>(0.5 to 17.1)</b> | <b>(-24.6 to -12.7)</b> |
| Cambodia              | 1672                    | 19.3                 | -11.1                  | 24254                     | 10.9                  | -17.2                   | 648                     | 16.9                 | -15.6                   |
|                       | (1218 to 2229)          | (-5.5 to 53.8)       | (-28.9 to 13.1)        | (17975 to 31645)          | (-10.3 to 41.2)       | (-33 to 4.4)            | (469 to 811)            | (-5.1 to 47.2)       | (-30.6 to 4.8)          |
| Indonesia             | 22497                   | 6.0                  | -15.9                  | 309308                    | 0.8                   | -21.1                   | 9086                    | 5.7                  | -18.1                   |
|                       | (16102 to 26420)        | (-3.4 to 18.5)       | (-23 to -7.2)          | (222647 to 361835)        | (-7.6 to 12.6)        | (-27.5 to -12.7)        | (6568 to 10741)         | (-2.7 to 16.5)       | (-24.6 to -10.2)        |
| Laos                  | 614                     | 11.9                 | -17.2                  | 8791                      | 2.6                   | -23.7                   | 246                     | 3.7                  | -23.1                   |
|                       | (386 to 824)            | (-12.7 to 47.5)      | (-34.6 to 7.2)         | (5701 to 11642)           | (-18.2 to 32.4)       | (-38.7 to -1.7)         | (149 to 314)            | (-16.0 to 32.6)      | (-37.3 to -3.9)         |
| Malaysia              | 2457                    | 44.8                 | 10.2                   | 28525                     | 36.3                  | 3.0                     | 709                     | 43.4                 | 2.6                     |
|                       | (1848 to 3057)          | (9.5 to 78.5)        | (-15.6 to 35.4)        | (21659 to 34323)          | (5.7 to 65.2)         | (-19.3 to 24.3)         | (643 to 776)            | (13.8 to 71.9)       | (-18.2 to 21.3)         |
| Maldives              | 16                      | 18.2                 | -26.2                  | 174                       | 7.8                   | -32.1                   | 5                       | 9.8                  | -32.3                   |
|                       | (13 to 20)              | (-2.5 to 46.4)       | (-38.9 to -7.6)        | (145 to 210)              | (-11.1 to 33.1)       | (-44.4 to -14.7)        | (4 to 6)                | (-9.6 to 38.8)       | (-44.2 to -12.2)        |
| Mauritius             | 106                     | 1.1                  | -16.3                  | 1259                      | -0.5                  | -19.8                   | 43                      | 7.3                  | -18.3                   |
|                       | (91 to 125)             | (-14.1 to 20)        | (-28.9 to -1.3)        | (1107 to 1428)            | (-13.4 to 13.5)       | (-30.1 to -8.7)         | (40 to 47)              | (-6.2 to 21.9)       | (-28.6 to -7.2)         |

|                                  |                         |                      |                       |                           |                       |                        |                       |                      |                        |
|----------------------------------|-------------------------|----------------------|-----------------------|---------------------------|-----------------------|------------------------|-----------------------|----------------------|------------------------|
| Myanmar                          | 7658                    | -6.1                 | -25.0                 | 109027                    | -13.7                 | -31.8                  | 43                    | -8.8                 | -29.8                  |
|                                  | (5427 to 10298)         | (-27.7 to 25.3)      | (-41.5 to -0.4)       | (78630 to 145480)         | (-32.1 to 14.6)       | (-45.8 to -10)         | (40 to 47)            | (-27.5 to 18.3)      | (-43.5 to -10.5)       |
| Philippines                      | 8023                    | 36.8                 | 9.1                   | 100693                    | 31.8                  | 4.0                    | 2108                  | 36.0                 | 3.4                    |
|                                  | (6245 to 10126)         | (4.7 to 75.8)        | (-16.6 to 40.1)       | (79545 to 125380)         | (1.8 to 67.3)         | (-19.4 to 31.5)        | (1912 to 2303)        | (5.9 to 71.1)        | (-18.7 to 28.6)        |
| Sri Lanka                        | 985                     | 12.0                 | -10.2                 | 11418                     | 2.8                   | -18.7                  | 374                   | 9.6                  | -18.2                  |
|                                  | (706 to 1297)           | (-16.9 to 49.5)      | (-33.0 to 20.4)       | (8045 to 14713)           | (-25 to 32.1)         | (-40.5 to 4.3)         | (298 to 405)          | (-19.1 to 38.1)      | (-39 to 2.4)           |
| Seychelles                       | 24                      | 20.2                 | -1.5                  | 279                       | 17.4                  | -7.1                   | 8                     | 17.3                 | -7.2                   |
|                                  | (20 to 29)              | (0.9 to 42.7)        | (-17.0 to 17.3)       | (233 to 322)              | (-0.2 to 37.4)        | (-20.7 to 8.3)         | (7 to 9)              | (1.4 to 37.1)        | (-19.8 to 7.4)         |
| Thailand                         | 8448                    | -7.7                 | -25.6                 | 94250                     | -11.2                 | -31.1                  | 3372                  | -5.2                 | -32.3                  |
|                                  | (6904 to 10577)         | (-26.3 to 14.2)      | (-40.7 to -7.9)       | (78255 to 118103)         | (-27.4 to 7.5)        | (-43.4 to -16.9)       | (2987 to 3830)        | (-21.3 to 13.0)      | (-43.5 to -19.4)       |
| Timor-Leste                      | 89                      | 27.4                 | -3.3                  | 1254                      | 17.9                  | -10.4                  | 33                    | 23.6                 | -10.3                  |
|                                  | (59 to 120)             | (0.2 to 63)          | (-23.5 to 22.4)       | (856 to 1665)             | (-5.8 to 49.2)        | (-28 to 13.1)          | (24 to 42)            | (0.4 to 53.7)        | (-25.7 to 10)          |
| Vietnam                          | 9375                    | 21.6                 | -9.4                  | 116150                    | 14.2                  | -15.7                  | 3430                  | 17.6                 | -13.8                  |
|                                  | (6992 to 12049)         | (-3.3 to 50.9)       | (-27.6 to 12.6)       | (86659 to 147654)         | (-9.2 to 42.1)        | (-32.7 to 4.6)         | (2663 to 4099)        | (-5.5 to 45.9)       | (-31.1 to 6.8)         |
| <b>Central sub-</b>              | <b>16071</b>            | <b>21.3</b>          | <b>-12.5</b>          | <b>265271</b>             | <b>17.0</b>           | <b>-15.5</b>           | <b>6419</b>           | <b>18.3</b>          | <b>-14.5</b>           |
| <b>Saharan Africa</b>            | <b>(11496 to 20128)</b> | <b>(3.8 to 43.2)</b> | <b>(-24.6 to 2.8)</b> | <b>(193429 to 332876)</b> | <b>(-0.5 to 38.5)</b> | <b>(-28.1 to -0.2)</b> | <b>(4620 to 7788)</b> | <b>(0.7 to 39.4)</b> | <b>(-26.6 to -0.1)</b> |
| Angola                           | 3425                    | 17.8                 | -22.1                 | 53382                     | 10.4                  | -26.8                  | 1286                  | 14.2                 | -25.4                  |
|                                  | (2352 to 4498)          | (-9.4 to 54.5)       | (-39.0 to -0.2)       | (37023 to 69657)          | (-14.3 to 41.7)       | (-41.9 to -6.9)        | (908 to 1601)         | (-9.6 to 45.9)       | (-40.8 to -5.7)        |
| Central African Republic         | 835                     | 0.1                  | -17.8                 | 15873                     | 3.5                   | -16.3                  | 416                   | 5.1                  | -15.4                  |
|                                  | (470 to 1199)           | (-23.7 to 28.8)      | (-36.4 to 4.2)        | (9208 to 22547)           | (-20.7 to 33.8)       | (-35.2 to 6.7)         | (250 to 594)          | (-18.5 to 33.8)      | (-32.9 to 5.4)         |
| Congo (Brazzaville)              | 995                     | 24.5                 | -13.6                 | 15657                     | 18.4                  | -18.2                  | 364                   | 18.0                 | -16.8                  |
|                                  | (543 to 1488)           | (-5.0 to 66.3)       | (-32.3 to 11.4)       | (8840 to 22798)           | (-7.1 to 52.9)        | (-35.1 to 3.4)         | (231 to 480)          | (-6.1 to 47.3)       | (-33.4 to 2.7)         |
| Democratic Republic of the Congo | 10480                   | 24.7                 | -8.0                  | 175524                    | 20.9                  | -10.6                  | 4212                  | 21.4                 | -10.0                  |
|                                  | (7127 to 13983)         | (-0.2 to 58)         | (-25.9 to 14.5)       | (119578 to 235897)        | (-3.3 to 49.8)        | (-27.9 to 10.6)        | (2922 to 5471)        | (-1.8 to 50.2)       | (-27.2 to 10.9)        |
| Equatorial                       | 127                     | 26.4                 | -17.4                 | 1718                      | 13.7                  | -24.2                  | 42                    | 14.9                 | -23.2                  |

|                                   |                         |                       |                        |                           |                      |                        |                         |                       |                        |
|-----------------------------------|-------------------------|-----------------------|------------------------|---------------------------|----------------------|------------------------|-------------------------|-----------------------|------------------------|
| Guinea                            | (69 to 201)             | (-10.9 to 81.8)       | (-40.2 to 16.5)        | (968 to 2711)             | (-18.1 to 62.1)      | (-45 to 5.9)           | (24 to 65)              | (-16.5 to 59.6)       | (-43.1 to 6.9)         |
| Gabon                             | 208                     | 4.3                   | -23.7                  | 3117                      | -3.2                 | -29.1                  | 98                      | -3.5                  | -27.6                  |
|                                   | (134 to 287)            | (-21.0 to 38.2)       | (-41.3 to -0.1)        | (2001 to 4185)            | (-25.4 to 25.9)      | (-45 to -7.9)          | (63 to 130)             | (-23.8 to 23.4)       | (-42.4 to -7.8)        |
| <b>Eastern sub-Saharan Africa</b> | <b>39062</b>            | <b>23.6</b>           | <b>-13.5</b>           | <b>646308</b>             | <b>18.0</b>          | <b>-16.9</b>           | <b>15719</b>            | <b>18.7</b>           | <b>-16.5</b>           |
|                                   | <b>(33250 to 46432)</b> | <b>(13.3 to 36.8)</b> | <b>(-20.3 to -5.0)</b> | <b>(549919 to 769675)</b> | <b>(8.9 to 29.7)</b> | <b>(-23.1 to -9.1)</b> | <b>(13108 to 18222)</b> | <b>(10.1 to 29.6)</b> | <b>(-22.4 to -8.7)</b> |
| Burundi                           | 1177                    | 20.9                  | -13.2                  | 20598                     | 17.3                 | -14.5                  | 494                     | 18.1                  | -13.4                  |
|                                   | (843 to 1591)           | (-4.5 to 52.4)        | (-30.5 to 8.7)         | (14886 to 27391)          | (-6.4 to 45.8)       | (-32.3 to 6.6)         | (342 to 641)            | (-6.0 to 47.3)        | (-30.1 to 6.1)         |
| Comoros                           | 127                     | 15.4                  | -12.0                  | 2115                      | 13.4                 | -14.4                  | 54                      | 16.8                  | -13.3                  |
|                                   | (91 to 173)             | (-6.6 to 44.9)        | (-28.3 to 10.1)        | (1527 to 2930)            | (-7.6 to 39.7)       | (-30.3 to 5)           | (41 to 70)              | (-4.9 to 42.5)        | (-29.3 to 6.1)         |
| Djibouti                          | 160                     | 41.0                  | -15.1                  | 2598                      | 32.0                 | -19.5                  | 54                      | 33.1                  | -18.4                  |
|                                   | (99 to 254)             | (7.3 to 88.2)         | (-34.5 to 11.5)        | (1611 to 4153)            | (0.7 to 75.3)        | (-37.8 to 6.5)         | (34 to 82)              | (2.8 to 76.5)         | (-35.8 to 6.4)         |
| Eritrea                           | 1033                    | 18.4                  | -12.8                  | 18179                     | 14.7                 | -15.1                  | 444                     | 16.7                  | -13.9                  |
|                                   | (713 to 1480)           | (-7.1 to 50)          | (-30.7 to 7.6)         | (12684 to 25657)          | (-9.3 to 41.8)       | (-31.7 to 3.3)         | (315 to 602)            | (-6 to 41.8)          | (-29.6 to 4.3)         |
| Ethiopia                          | 7416                    | 7.7                   | -24.8                  | 122492                    | -1.4                 | -29.7                  | 3688                    | -0.4                  | -29.4                  |
|                                   | (5523 to 11738)         | (-10.4 to 41.9)       | (-36.5 to -2.1)        | (92549 to 192761)         | (-16.7 to 28.8)      | (-40.3 to -9.3)        | (2863 to 5556)          | (-15.3 to 28.1)       | (-39.4 to -10.1)       |
| Kenya                             | 3429                    | 28.7                  | -12.2                  | 53353                     | 24.8                 | -15.1                  | 1221                    | 26.9                  | -13.5                  |
|                                   | (2813 to 4828)          | (14.8 to 50.1)        | (-21.1 to 2.1)         | (43698 to 76026)          | (12.4 to 43.5)       | (-23.3 to -2.6)        | (922 to 1606)           | (14.8 to 45.3)        | (-21.6 to -1.3)        |
| Madagascar                        | 3415                    | 33.6                  | -5.7                   | 58152                     | 32.4                 | -7.1                   | 1206                    | 33.1                  | -6.7                   |
|                                   | (2441 to 4624)          | (6.6 to 70.6)         | (-24.6 to 20.0)        | (41023 to 77528)          | (5.3 to 68.4)        | (-26.3 to 17.9)        | (896 to 1515)           | (5.9 to 68.5)         | (-25.8 to 16.1)        |
| Malawi                            | 2042                    | 25.4                  | -13.1                  | 32291                     | 19.4                 | -16.8                  | 774                     | 21.0                  | -15.9                  |
|                                   | (1423 to 2799)          | (-7.5 to 72.5)        | (-34.4 to 18.2)        | (23308 to 43429)          | (-9.8 to 60.2)       | (-36.6 to 10.5)        | (590 to 976)            | (-6.6 to 58.8)        | (-34.9 to 10.2)        |
| Mozambique                        | 3955                    | 29.4                  | -6.3                   | 68061                     | 24.6                 | -9.0                   | 1543                    | 24.0                  | -8.5                   |
|                                   | (2503 to 5544)          | (-0.5 to 71.0)        | (-27.8 to 23.7)        | (43193 to 93235)          | (-4.7 to 61.9)       | (-30.4 to 18.3)        | (999 to 2073)           | (-5.0 to 59.7)        | (-30.3 to 17.7)        |
| Rwanda                            | 1426                    | 21.9                  | -17.4                  | 23079                     | 13.9                 | -22.3                  | 581                     | 18.2                  | -21.1                  |
|                                   | (1035 to 2025)          | (-4.7 to 55.4)        | (-35.1 to 3.7)         | (16648 to 31790)          | (-8.9 to 40.8)       | (-37.7 to -4)          | (448 to 751)            | (-4.7 to 46.1)        | (-35.8 to -2.9)        |
| Somalia                           | 2527                    | 28.2                  | -6.4                   | 45546                     | 21.2                 | -9.2                   | 1060                    | 22.5                  | -8.3                   |

|                       |                         |                        |                         |                           |                        |                         |                         |                        |                       |
|-----------------------|-------------------------|------------------------|-------------------------|---------------------------|------------------------|-------------------------|-------------------------|------------------------|-----------------------|
|                       | (1626 to 3736)          | (2.8 to 65.5)          | (-24.5 to 19.3)         | (29214 to 66654)          | (-2.4 to 55.9)         | (-26.6 to 15.6)         | (712 to 1444)           | (-0.8 to 56)           | (-25.3 to 14.9)       |
| South Sudan           | 1292                    | 21.4                   | -5.8                    | 21822                     | 22.3                   | -7.1                    | 482                     | 23.5                   | -7.2                  |
|                       | (860 to 1851)           | (-4.7 to 59.8)         | (-25.5 to 22.4)         | (14864 to 30907)          | (-2.5 to 59.7)         | (-26.4 to 20.8)         | (313 to 682)            | (-1.3 to 60.1)         | (-25.6 to 19.2)       |
| Tanzania              | 5930                    | 32.6                   | -5.5                    | 94738                     | 28.0                   | -9.0                    | 2188                    | 27.5                   | -8.5                  |
|                       | (4281 to 8045)          | (0.8 to 74.6)          | (-26.5 to 21.9)         | (69970 to 126173)         | (-0.4 to 63.8)         | (-28.5 to 16.5)         | (1617 to 3104)          | (0.6 to 61.3)          | (-27.5 to 14.2)       |
| Uganda                | 3124                    | 12.8                   | -22.1                   | 50060                     | 9.7                    | -24.3                   | 1291                    | 11.2                   | -23.9                 |
|                       | (2300 to 4080)          | (-13.3 to 45.6)        | (-38.7 to -2.2)         | (38353 to 64203)          | (-13.7 to 37.4)        | (-40.4 to -5.0)         | (1035 to 1558)          | (-11.9 to 38.8)        | (-38.9 to -4.9)       |
| Zambia                | 1986                    | 55.0                   | -0.1                    | 32818                     | 46.1                   | -5.2                    | 629                     | 47.2                   | -4.5                  |
|                       | (1433 to 2578)          | (17.5 to 103.6)        | (-24.7 to 30.6)         | (23950 to 41708)          | (11.1 to 92.0)         | (-28.1 to 24.0)         | (478 to 828)            | (12.8 to 91.2)         | (-27.3 to 22.7)       |
| <b>Southern sub-</b>  | <b>12498</b>            | <b>-17.8</b>           | <b>-32.3</b>            | <b>182929</b>             | <b>-17.6</b>           | <b>-32.7</b>            | <b>6582</b>             | <b>-10.7</b>           | <b>-28.5</b>          |
| <b>Saharan Africa</b> | <b>(11079 to 13588)</b> | <b>(-29.9 to -7.0)</b> | <b>(-41.6 to -24.0)</b> | <b>(162744 to 199885)</b> | <b>(-27.5 to -7.8)</b> | <b>(-40.4 to -25.1)</b> | <b>(6057 to 7431)</b>   | <b>(-19.8 to -1.0)</b> | <b>(-35.2 to -21)</b> |
| Botswana              | 312                     | 43.3                   | 0.9                     | 4391                      | 32.9                   | -6.1                    | 108                     | 29.7                   | -4.7                  |
|                       | (240 to 386)            | (-17.8 to 120.4)       | (-41.1 to 51.7)         | (3428 to 5356)            | (-22.2 to 101.1)       | (-44.8 to 41.8)         | (75 to 169)             | (-22.7 to 91.2)        | (-43 to 39.8)         |
| Lesotho               | 373                     | -6.8                   | -15.3                   | 6286                      | -9.3                   | -17.2                   | 229                     | -8.8                   | -15.5                 |
|                       | (238 to 541)            | (-35.9 to 31.1)        | (-41.1 to 18.4)         | (3987 to 8910)            | (-37.6 to 28.9)        | (-43 to 17.0)           | (163 to 307)            | (-35.7 to 26.5)        | (-39.9 to 16.1)       |
| Namibia               | 229                     | 3.3                    | -22.8                   | 3444                      | -3.1                   | -27.9                   | 115                     | -1.9                   | -27.6                 |
|                       | (161 to 318)            | (-25.2 to 48.3)        | (-43.9 to 9.8)          | (2513 to 4715)            | (-29.9 to 37.7)        | (-47.9 to 1.4)          | (83 to 149)             | (-28.5 to 35)          | (-47.1 to -0.4)       |
| South Africa          | 9327                    | -23.1                  | -36.0                   | 129706                    | -22.6                  | -36.1                   | 4914                    | -14.1                  | -30.8                 |
|                       | (8264 to 10145)         | (-36 to -11.1)         | (-46.3 to -26.4)        | (116256 to 140314)        | (-34.1 to -11.7)       | (-45.1 to -27.3)        | (4587 to 5601)          | (-24.4 to -2.4)        | (-38.8 to -21.6)      |
| Swaziland             | 163                     | -13.8                  | -28.0                   | 2536                      | -19.5                  | -32.1                   | 94                      | -15.3                  | -30.1                 |
| (eSwatini)            | (106 to 239)            | (-38.5 to 22.5)        | (-47.5 to -0.3)         | (1631 to 3690)            | (-41.8 to 12.6)        | (-50.3 to -6.6)         | (58 to 129)             | (-37.2 to 15.7)        | (-47.6 to -6.2)       |
| Zimbabwe              | 2095                    | 1.7                    | -23.2                   | 36565                     | -2.1                   | -26.0                   | 1122                    | -0.8                   | -24.6                 |
|                       | (1540 to 2727)          | (-21.5 to 30.6)        | (-39.8 to -3.0)         | (26892 to 47334)          | (-23.1 to 23.5)        | (-41.7 to -7.8)         | (891 to 1354)           | (-22.1 to 23.1)        | (-40.3 to -7)         |
| <b>Western sub-</b>   | <b>39955</b>            | <b>30.2</b>            | <b>-8.0</b>             | <b>611846</b>             | <b>28.6</b>            | <b>-10.2</b>            | <b>13637</b>            | <b>29.8</b>            | <b>-9.2</b>           |
| <b>Saharan Africa</b> | <b>(31011 to 49933)</b> | <b>(12.6 to 51.5)</b>  | <b>(-18.9 to 6.2)</b>   | <b>(480371 to 753733)</b> | <b>(13.7 to 47.7)</b>  | <b>(-19.9 to 2.8)</b>   | <b>(10774 to 16838)</b> | <b>(16.2 to 48.4)</b>  | <b>(-18.4 to 3.1)</b> |
| Benin                 | 1120                    | 36.3                   | -4.1                    | 18117                     | 36.5                   | -5.0                    | 393                     | 36.5                   | -4.2                  |



|               |                |                |                 |                  |                |                 |               |                |                 |
|---------------|----------------|----------------|-----------------|------------------|----------------|-----------------|---------------|----------------|-----------------|
|               | (767 to 1481)  | (5.1 to 72.6)  | (-24.7 to 18.9) | (12450 to 24044) | (7.2 to 73.0)  | (-25.1 to 19.6) | (290 to 504)  | (7.9 to 70.4)  | (-24 to 19.7)   |
| Burkina Faso  | 2601           | 40.9           | -1.2            | 41434            | 38.9           | -2.4            | 857           | 40.0           | -0.9            |
|               | (1852 to 3406) | (12 to 76.8)   | (-20.1 to 22.5) | (29346 to 53314) | (13.4 to 71.0) | (-19.9 to 19.2) | (649 to 1048) | (15.9 to 70.7) | (-17.2 to 20.7) |
| Cameroon      | 2671           | 20.6           | -18.2           | 42277            | 16.9           | -20.3           | 1044          | 17.7           | -18.7           |
|               | (1626 to 3767) | (-7.3 to 57.2) | (-36.2 to 5.7)  | (25627 to 59406) | (-9.7 to 49.1) | (-38.3 to 2.0)  | (712 to 1356) | (-8.6 to 49.4) | (-36.2 to 3)    |
| Cape Verde    | 54             | 37.7           | 7.4             | 715              | 27.6           | -0.3            | 20            | 27.8           | 0.0             |
|               | (45 to 73)     | (11.7 to 67.1) | (-12.5 to 29.1) | (603 to 931)     | (3.8 to 50.2)  | (-18.7 to 16.8) | (18 to 25)    | (6.0 to 49.6)  | (-16.8 to 16.5) |
| Chad          | 1443           | 32.7           | -2.0            | 24638            | 30.7           | -3.5            | 554           | 28.9           | -2.3            |
|               | (996 to 1930)  | (3.7 to 67.9)  | (-22.4 to 22.6) | (17020 to 32902) | (3.7 to 63.1)  | (-23.6 to 19.9) | (415 to 702)  | (2.9 to 60.2)  | (-22.6 to 21.2) |
| Côte d'Ivoire | 1089           | 20.0           | -10.9           | 18719            | 16.2           | -13.5           | 456           | 17.2           | -13.2           |
|               | (793 to 1459)  | (-6.5 to 63.4) | (-30.3 to 20.1) | (13869 to 13869) | (-9.2 to 57.3) | (-32.4 to 15.1) | (342 to 581)  | (-7.8 to 55.9) | (-31.2 to 13.6) |
| The Gambia    | 169            | 31.6           | -4.6            | 2655             | 28.4           | -6.6            | 60            | 27.6           | -6.9            |
|               | (126 to 231)   | (0.6 to 67.2)  | (-26 to 20.6)   | (1991 to 3540)   | (1.0 to 60.3)  | (-27.4 to 17.6) | (47 to 75)    | (-0.2 to 58.8) | (-27 to 17.0)   |
| Ghana         | 3693           | 34.0           | -6.9            | 54367            | 26.8           | -11.4           | 1224          | 28.3           | -10.3           |
|               | (2408 to 4956) | (4.4 to 73.3)  | (-26.8 to 18.9) | (35457 to 72475) | (-0.5 to 60.7) | (-30.3 to 12.4) | (812 to 1574) | (1.8 to 62.1)  | (-28.4 to 12.6) |
| Guinea        | 1955           | 18.1           | -5.7            | 32535            | 15.3           | -6.7            | 848           | 9.9            | -6.0            |
|               | (1486 to 2506) | (-6.6 to 46.4) | (-25.4 to 16.9) | (24646 to 41305) | (-6.7 to 41.6) | (-24.3 to 14.8) | (680 to 1025) | (-10.2 to 34)  | (-22.9 to 14.0) |
| Guinea-Bissau | 251            | 24.0           | -7.8            | 4178             | 18.9           | -10.4           | 98            | 19.1           | -8.6            |
|               | (158 to 352)   | (-4.4 to 58.7) | (-27.2 to 15)   | (2685 to 5729)   | (-6.0 to 49.7) | (-28.4 to 10.9) | (68 to 126)   | (-4.5 to 47.5) | (-26.7 to 12.8) |
| Liberia       | 462            | 38.0           | -3.5            | 7406             | 36.6           | -4.5            | 159           | 33.7           | -3.0            |
|               | (306 to 626)   | (9.2 to 74.8)  | (-22.7 to 19.2) | (4920 to 9956)   | (9.2 to 69.4)  | (-22.5 to 18.5) | (111 to 204)  | (8.1 to 63.6)  | (-20.6 to 18.1) |
| Mali          | 1437           | 27.8           | -8.6            | 22262            | 22.0           | -11.8           | 509           | 23.6           | -10.7           |
|               | (1010 to 2093) | (-0.2 to 61.6) | (-27.7 to 13.1) | (16137 to 32257) | (-2.3 to 50.7) | (-29.4 to 7.9)  | (395 to 673)  | (-0.2 to 50.4) | (-27.2 to 8.2)  |
| Mauritania    | 414            | 24.0           | -7.0            | 6220             | 18.7           | -11.4           | 161           | 20.6           | -10.3           |
|               | (295 to 546)   | (-1.5 to 53.6) | (-25.6 to 14.5) | (4387 to 8145)   | (-4.7 to 45.0) | (-28.9 to 8.8)  | (120 to 198)  | (-3.0 to 47.0) | (-27.3 to 8.9)  |
| Niger         | 1951           | 34.8           | -3.6            | 32787            | 34.9           | -4.7            | 686           | 40.1           | -3.1            |

|                       |                  |                |                 |                    |                |                 |                |               |                 |
|-----------------------|------------------|----------------|-----------------|--------------------|----------------|-----------------|----------------|---------------|-----------------|
|                       | (1310 to 2626)   | (6.4 to 70.7)  | (-22.3 to 20.2) | (22548 to 43502)   | (8 to 68.5)    | (-23.2 to 18.0) | (507 to 902)   | (12.8 to 74)  | (-21 to 19.6)   |
| Nigeria               | 17265            | 30.8           | -8.7            | 248421             | 32             | -10.5           | 5314           | 34.1          | -9.5            |
|                       | (10762 to 26399) | (-3.4 to 84.7) | (-31.0 to 26.3) | (154709 to 377202) | (0.9 to 83.8)  | (-30.7 to 23.1) | (3110 to 7945) | (4.3 to 84.2) | (-28.7 to 22.0) |
| São Tomé and Príncipe | 30               | 23.3           | -7.9            | 442                | 22.0           | -9.9            | 10             | 23.7          | -6.7            |
|                       | (19 to 42)       | (-2.7 to 56.1) | (-26.3 to 14.4) | (280 to 600)       | (0.2 to 50.6)  | (-25.6 to 11.2) | (7 to 14)      | (2.2 to 51.2) | (-22.8 to 13.3) |
| Senegal               | 1596             | 30.6           | -0.1            | 26623              | 28.6           | -2.2            | 619            | 31.3          | -1.0            |
|                       | (1185 to 2061)   | (3.2 to 61.6)  | (-19.8 to 22.3) | (20057 to 33762)   | (2.8 to 56.6)  | (-20.8 to 18.9) | (494 to 741)   | (7.7 to 58.5) | (-18.3 to 19.4) |
| Sierra Leone          | 908              | 24.8           | -6.3            | 14529              | 24.4           | -7.2            | 337            | 25.4          | -5.6            |
|                       | (577 to 1234)    | (0.4 to 56.0)  | (-24.4 to 16.9) | (9187 to 19621)    | (-0.7 to 55.4) | (-25.4 to 15.8) | (236 to 427)   | (1.3 to 55.2) | (-23.3 to 16.7) |
| Togo                  | 845              | 38.6           | -4.1            | 13517              | 34             | -7.6            | 286            | 37.3          | -7.1            |
|                       | (564 to 1146)    | (3.9 to 82.0)  | (-27.3 to 25.6) | (9289 to 18299)    | (2.3 to 75.3)  | (-29.1 to 21.8) | (206 to 372)   | (5.1 to 80.7) | (-28.0 to 19.9) |

UI= 95% uncertainty intervals. DALYs=disability-adjusted life-years. SDI=Socio-demographic Index.
